# Supplementary material
Source: PubMed Central journal article supplement (PMC6214784)
Supplement: NIHMS964045-supplement-Supp_TableS1.pdf [file NIHMS964045-supplement-Supp_TableS1.pdf]

**Supplementary Table 1.** Sequences and probes for qRT-PCR.

| Variants     | Primers           | With primers            | Probe | Orientations | Sequences                |
|--------------|-------------------|-------------------------|-------|--------------|--------------------------|
| mExon I      | mBDNF 1           | 9AS1                    | 31    | Sense        | agtctccaggacagcaaagc     |
| mExon IIA    | mBDNF 2A          | 9AS2                    | 31    | Sense        | ggatttgccgaggtgtagt      |
| mExon IIB    | mBDNF 2B          | 9AS2                    | 31    | Sense        | gcggtgtagcctggaataga     |
| mExon IIC    | mBDNF 2C          | 9AS6                    | 31    | Sense        | gtggtgtaagccgcaaaga      |
| mExon III    | mBDNF 3           | 9AS2                    | 31    | Sense        | gagactgcgctccactcc       |
| mExon IV     | mBDNF 4           | 9AS2                    | 31    | Sense        | gctgccttgatgtttactttga   |
| mExon IV-GFP | mExon 4-GFP S     | GFP AS                  | 17    | Sense        | ccctcccccttttaactgaa     |
| mExon V      | mBDNF 5           | 9AS2                    | 31    | Sense        | tcgcttttctagctttgtgg     |
| mExon VI     | mBDNF 6           | 9AS2                    | 31    | Sense        | agcgtgacaacaatgtgact     |
| mExon VIIA   | mBDNF 7A          | 9AS2                    | 31    | Sense        | ctcctgaggaagtgaagtgttg   |
| mExon VIIB   | mBDNF 7B          | 9AS4                    | 88    | Sense        | ctgtatccgaccctctgtcc     |
| mExon VIII   | mBDNF 8           | 9AS2                    | 31    | Sense        | gtcgcctgcgctcagtgagccga  |
| mExon IXA    | mBDNF 9A          | 9AS2                    | 31    | Sense        | ttacaagcagatggccacat     |
| mExon IX     | mBDNF 9 coding    | 9CAS                    | 86    | Sense        | gtcacagcggcagataa        |
| mExon IX     | mBDNF 9-AS1       | 1                       |       | Antisense    | tgcaaccgaagtatgaaataacc  |
| mExon IX     | mBDNF 9-AS2       | 2A, 2B, 2C, 3, 4, 5, 7A |       | Antisense    | aaggatggtcatcactcttctca  |
| mExon IX     | mBDNF 9-AS4       | 7B                      |       | Antisense    | cacacaccacagcctttctc     |
| mExon IX     | mBDNF 9-AS6       | 2C                      |       | Antisense    | aacctagtaaggaaaaggatggtc |
| mExon IX     | mBDNF 9 coding-AS | 9C                      |       | Antisense    | gacctttcaaggactgtgacc    |
| mExon IV-GFP | GFP-AS            | 4-GFP-S                 |       | Antisense    | tccagctcgaccaggatg       |
| CyclophilinD | CyclophilinD-S    | CyclophilinD-AS         | 21    | Sense        | atggtgaaaaacctgcaaaa     |
| CyclophilinD | CyclophilinD-AS   | CyclophilinD-S          |       | Antisense    | catcctcaggaagtctgga      |
| HGPRT        | HGPRT-S           | HGPRT-AS                | 95    | HGPRT-AS     | tcctcctcagaccgctttt      |
| HGPRT        | HGPRT-AS          | HGPRT-S                 |       | HGPRT-AS     | cctggtt,catcatcgtaatc    |
