# Supplementary material
Source: PubMed Central journal article supplement (PMC6214784)
Supplement: NIHMS964045-supplement-Supp_TableS2.pdf [file NIHMS964045-supplement-Supp_TableS2.pdf]

## Supplementary Table 2. Statistical Analyses

### 1. Figure 1b SPT

#### a. Genotype x Enriched Environment Treatment Effects

| Two-way ANOVA               |        |      | Genotype Effects                   | Treatment Effects                 | Genotype X Treatment Interactions  | Post hoc Bonferroni Test Genotype Effects (WT vs KIV) |                               | Post hoc Bonferroni Test Treatment Effects (SCT vs EET) |                               |
|-----------------------------|--------|------|------------------------------------|-----------------------------------|------------------------------------|-------------------------------------------------------|-------------------------------|---------------------------------------------------------|-------------------------------|
|                             |        |      |                                    |                                   |                                    | SCT                                                   | EET                           | WT                                                      | KIV                           |
| Early-life Development (ED) | Male   | Pre  | $F_{(1,56)} = 8.2$<br>$P < 0.01$   | $F_{(1,56)} = 8.4$<br>$P < 0.005$ | $F_{(1,56)} = 7.0$<br>$P < 0.05$   | $T_{28} = 3.9$<br>$P < 0.001$                         | $T_{28} = 0.15$<br>$P > 0.05$ | $T_{28} = 0.18$<br>$P > 0.05$                           | $T_{28} = 3.9$<br>$P < 0.001$ |
|                             |        | Post | $F_{(1,56)} = 16.7$<br>$P < 0.001$ | $F_{(1,56)} = 5.4$<br>$P < 0.05$  | $F_{(1,56)} = 4.6$<br>$P < 0.05$   | $T_{28} = 4.4$<br>$P < 0.0001$                        | $T_{28} = 1.4$<br>$P > 0.05$  | $T_{28} = 0.1$<br>$P > 0.05$                            | $T_{28} = 3.2$<br>$P < 0.01$  |
|                             | Female | Pre  | $F_{(1,56)} = 1.9$<br>$P = 0.17$   | $F_{(1,56)} = 3.0$<br>$P = 0.09$  | $F_{(1,56)} = 14.5$<br>$P < 0.001$ | $T_{28} = 3.7$<br>$P < 0.01$                          | $T_{28} = 1.7$<br>$P > 0.05$  | $T_{28} = 1.5$<br>$P > 0.05$                            | $T_{28} = 3.9$<br>$P < 0.001$ |
|                             |        | Post | $F_{(1,56)} = 8.9$<br>$P < 0.005$  | $F_{(1,56)} = 1.3$<br>$P = 0.17$  | $F_{(1,55)} = 9.2$<br>$P < 0.01$   | $T_{28} = 4.3$<br>$P < 0.001$                         | $T_{28} = 0.03$<br>$P > 0.05$ | $T_{28} = 1.4$<br>$P > 0.05$                            | $T_{28} = 2.9$<br>$P < 0.01$  |
| Young Adult (YA)            | Male   | Pre  | $F_{(1,56)} = 2.4$<br>$P = 0.12$   | $F_{(1,56)} = 1.5$<br>$P = 0.22$  | $F_{(1,56)} = 6.2$<br>$P < 0.05$   | $T_{28} = 2.9$<br>$P < 0.05$                          | $T_{28} = 0.66$<br>$P > 0.05$ | $T_{28} = 0.88$<br>$P > 0.05$                           | $T_{28} = 2.6$<br>$P < 0.05$  |
|                             |        | Post | $F_{(1,49)} = 7.9$<br>$P < 0.01$   | $F_{(1,49)} = 5.5$<br>$P < 0.05$  | $F_{(1,49)} = 1.1$<br>$P = 0.31$   | $T_{28} = 2.9$<br>$P < 0.05$                          | $T_{21} = 1.1$<br>$P > 0.05$  | $T_{28} = 0.92$<br>$P > 0.05$                           | $T_{28} = 2.4$<br>$P < 0.05$  |
|                             | Female | Pre  | $F_{(1,56)} = 2.7$<br>$P = 0.11$   | $F_{(1,56)} = 1.6$<br>$P = 0.21$  | $F_{(1,56)} = 4.5$<br>$P < 0.05$   | $T_{28} = 2.7$<br>$P < 0.05$                          | $T_{28} = 0.34$<br>$P > 0.05$ | $T_{28} = 0.59$<br>$P > 0.05$                           | $T_{28} = 2.4$<br>$P < 0.05$  |
|                             |        | Post | $F_{(1,56)} = 4.3$<br>$P < 0.05$   | $F_{(1,56)} = 0.2$<br>$P = 0.63$  | $F_{(1,56)} = 5.0$<br>$P = 0.03$   | $T_{28} = 3.1$<br>$P < 0.01$                          | $T_{28} = 0.12$<br>$P > 0.05$ | $T_{28} = 1.2$<br>$P > 0.05$                            | $T_{28} = 1.9$<br>$P > 0.05$  |
| Old Adult (OA)              | Male   | Pre  | $F_{(1,56)} = 1.8$<br>$P = 0.19$   | $F_{(1,56)} = 2.4$<br>$P = 0.12$  | $F_{(1,56)} = 4.5$<br>$P < 0.05$   | $T_{28} = 2.4$<br>$P < 0.05$                          | $T_{28} = 0.55$<br>$P > 0.05$ | $T_{28} = 0.40$<br>$P > 0.05$                           | $T_{28} = 2.6$<br>$P < 0.05$  |
|                             |        | Post | $F_{(1,56)} = 2.4$<br>$P = 0.13$   | $F_{(1,56)} = 1.6$<br>$P = 0.22$  | $F_{(1,56)} = 4.0$<br>$P < 0.05$   | $T_{28} = 2.5$<br>$P < 0.05$                          | $T_{28} = 0.31$<br>$P > 0.05$ | $T_{28} = 0.52$<br>$P > 0.05$                           | $T_{28} = 2.3$<br>$P > 0.05$  |
|                             | Female | Pre  | $F_{(1,56)} = 5.0$<br>$P < 0.05$   | $F_{(1,56)} = 4.3$<br>$P < 0.05$  | $F_{(1,56)} = 2.7$<br>$P = 0.11$   | $T_{28} = 2.7$<br>$P < 0.05$                          | $T_{28} = 0.42$<br>$P > 0.05$ | $T_{28} = 0.31$<br>$P > 0.05$                           | $T_{28} = 2.6$<br>$P < 0.05$  |
|                             |        | Post | $F_{(1,56)} = 2.2$<br>$P = 0.15$   | $F_{(1,56)} = 0.03$<br>$P = 0.87$ | $F_{(1,56)} = 8.2$<br>$P < 0.01$   | $T_{28} = 3.1$<br>$P < 0.01$                          | $T_{28} = 1.0$<br>$P > 0.05$  | $T_{28} = 1.9$<br>$P > 0.05$                            | $T_{28} = 2.1$<br>$P > 0.05$  |

| Student's <i>t</i> -test | WT-SCT vs. KIV-EET |        |        | WT-SCT vs. KIV-EET-SCT |        |        |
|--------------------------|--------------------|--------|--------|------------------------|--------|--------|
|                          | ED                 | YA     | OA     | ED                     | YA     | OA     |
| Male                     | P=0.97             | P=0.11 | P=0.82 | P=0.74                 | P=0.72 | P=0.81 |
| Female                   | P=0.81             | P=0.07 | P=0.76 | P=0.17                 | P=0.90 | P=0.40 |

### 2. Supplementary Figure 1 Age Effects on Sucrose Preference

#### a. Age effects on genotype (Suppl. Fig. 1a)

| One-way ANOVA | Age Effect (ED YA OA) |           |
|---------------|-----------------------|-----------|
| % WT          | Male                  | P = 0.745 |
|               | Female                | P = 0.671 |

#### b. Genotype x age effects on EET effects (Suppl. Fig. 1b and 1c)

| Two-way ANOVA |        | Genotype Effects                   | Age Effects                        | Genotype X Age Interactions       |
|---------------|--------|------------------------------------|------------------------------------|-----------------------------------|
| Pre (T1)      | Male   | $F_{(1,84)} = 50.6$<br>$P < 0.001$ | $F_{(2, 84)} = 2.1$<br>$P > 0.05$  | $F_{(2,84)} = 0.47$<br>$P > 0.05$ |
|               | Female | $F_{(1,83)} = 46.6$<br>$P < 0.001$ | $F_{(2, 83)} = 0.04$<br>$P > 0.05$ | $F_{(2,83)} = 0.14$<br>$P > 0.05$ |
| Post (T2)     | Male   | $F_{(1,77)} = 13.4$<br>$P < 0.001$ | $F_{(2, 77)} = 0.27$<br>$P > 0.05$ | $F_{(2,77)} = 0.37$<br>$P > 0.05$ |
|               | Female | $F_{(1,84)} = 44.5$<br>$P < 0.001$ | $F_{(2, 84)} = 1.9$<br>$P > 0.05$  | $F_{(2,84)} = 4.02$<br>$P < 0.05$ |

### 3. Fig. 2 Total BDNF mRNA (exon IXc)

a. Basal level (Fig. 2a)

Genotype x age effects

| Two-way ANOVA  | Genotype Effects                   | Age Effects                       | Genotype X Age Interactions       | Post hoc Bonferroni multiple comparisons |                                |                                |                               |                               |                               |                               |                               |                               |
|----------------|------------------------------------|-----------------------------------|-----------------------------------|------------------------------------------|--------------------------------|--------------------------------|-------------------------------|-------------------------------|-------------------------------|-------------------------------|-------------------------------|-------------------------------|
|                |                                    |                                   |                                   | Genotype Effects (WT vs. KIV)            |                                |                                | Age Effects (ED, YA, OA)      |                               |                               |                               |                               |                               |
|                |                                    |                                   |                                   | ED                                       | YA                             | OA                             | WT                            |                               |                               | KIV                           |                               |                               |
|                |                                    |                                   |                                   |                                          |                                |                                | ED vs YA                      | ED vs OA                      | YA vs OA                      | ED vs YA                      | ED vs OA                      | YA vs OA                      |
| Hippocampus    | $F_{(1,90)} = 60.5$<br>$P < 0.001$ | $F_{(2,90)} = 0.11$<br>$P > 0.05$ | $F_{(2,90)} = 0.28$<br>$P > 0.05$ | $T_{30} = 4.7$<br>$P < 0.001$            | $T_{30} = 4.9$<br>$P < 0.001$  | $T_{30} = 3.9$<br>$P < 0.001$  | $T_{30} = 0.16$<br>$P > 0.05$ | $T_{30} = 0.09$<br>$P > 0.05$ | $T_{30} = 0.25$<br>$P > 0.05$ | $T_{30} = 0.03$<br>$P > 0.05$ | $T_{30} = 0.71$<br>$P > 0.05$ | $T_{30} = 0.74$<br>$P > 0.05$ |
| Frontal Cortex | $F_{(1,90)} = 369$<br>$P < 0.001$  | $F_{(2,90)} = 7.8$<br>$P < 0.001$ | $F_{(2,90)} = 9.0$<br>$P < 0.001$ | $T_{30} = 14.0$<br>$P < 0.001$           | $T_{30} = 11.2$<br>$P < 0.001$ | $T_{30} = 8.03$<br>$P < 0.001$ | $T_{30} = 2.1$<br>$P > 0.05$  | $T_{30} = 5.7$<br>$P < 0.001$ | $T_{30} = 3.6$<br>$P < 0.01$  | $T_{30} = 0.74$<br>$P > 0.05$ | $T_{30} = 0.31$<br>$P > 0.05$ | $T_{30} = 0.42$<br>$P > 0.05$ |

b. BDNF induction by EET (T1) (Fig. 2b)

EET x age effects

| Two-way ANOVA  | EET Effects | Age Effects                        | EET X Age Interactions            | Post hoc Bonferroni multiple comparisons |                                |                               |                                |                               |                                |                                |
|----------------|-------------|------------------------------------|-----------------------------------|------------------------------------------|--------------------------------|-------------------------------|--------------------------------|-------------------------------|--------------------------------|--------------------------------|
|                |             |                                    |                                   | EET Effects (EET vs. SCT)                |                                |                               | Age Effects (ED, YA, OA)       |                               |                                |                                |
|                |             |                                    |                                   | ED                                       | YA                             | OA                            | EET                            |                               |                                |                                |
|                |             |                                    |                                   |                                          |                                |                               | ED vs YA                       | ED vs OA                      | YA vs OA                       |                                |
| Hippocampus    | WT          | $F_{(1,38)} = 27.1$<br>$P < 0.001$ | $F_{(1,38)} = 0.59$<br>$P > 0.05$ | $F_{(2,38)} = 0.41$<br>$P > 0.05$        | $T_{13} = 2.61$<br>$P < 0.05$  | $T_{13} = 2.63$<br>$P < 0.05$ | $T_{13} = 3.78$<br>$P < 0.01$  |                               |                                |                                |
|                | KIV         | $F_{(1,38)} = 35$<br>$P < 0.001$   | $F_{(1,38)} = 0.18$<br>$P > 0.05$ | $F_{(2,38)} = 0.14$<br>$P > 0.05$        | $T_{12} = 3.39$<br>$P < 0.01$  | $T_{13} = 3.80$<br>$P < 0.01$ | $T_{13} = 1.29$<br>$P < 0.05$  |                               |                                |                                |
| Frontal Cortex | WT          | $F_{(1,42)} = 23.5$<br>$P < 0.001$ | $F_{(2,42)} = 1.34$<br>$P > 0.05$ | $F_{(2,42)} = 1.34$<br>$P > 0.05$        | $T_{14} = 2.29$<br>$P > 0.05$  | $T_{14} = 1.98$<br>$P > 0.05$ | $T_{14} = 4.12$<br>$P < 0.001$ |                               |                                |                                |
|                | KIV         | $F_{(1,42)} = 5.96$<br>$P < 0.05$  | $F_{(2,42)} = 7.35$<br>$P < 0.01$ | $F_{(2,42)} = 8.16$<br>$P < 0.01$        | $T_{14} = 4.60$<br>$P < 0.001$ | $T_{14} = 0.55$<br>$P > 0.05$ | $T_{14} = 0.92$<br>$P > 0.05$  | $T_{14} = 4.05$<br>$P < 0.01$ | $T_{14} = 5.33$<br>$P < 0.001$ | $T_{14} = 0.184$<br>$P > 0.05$ |

Genotype x age effects

| Two-way ANOVA  | Genotype Effects                  | Age Effects                         | Genotype X Age Interactions        | Post hoc Bonferroni multiple comparisons |                               |                                |                               |                               |                               |                               |                                |                               |
|----------------|-----------------------------------|-------------------------------------|------------------------------------|------------------------------------------|-------------------------------|--------------------------------|-------------------------------|-------------------------------|-------------------------------|-------------------------------|--------------------------------|-------------------------------|
|                |                                   |                                     |                                    | Genotype Effects (WT vs. KIV)            |                               |                                | Age Effects (ED, YA, OA)      |                               |                               |                               |                                |                               |
|                |                                   |                                     |                                    | ED                                       | YA                            | OA                             | WT                            |                               |                               | KIV                           |                                |                               |
|                |                                   |                                     |                                    |                                          |                               |                                | ED vs YA                      | ED vs OA                      | YA vs OA                      | ED vs YA                      | ED vs OA                       | YA vs OA                      |
| Hippocampus    | $F_{(1,36)} = 0.97$<br>$P > 0.05$ | $F_{(2,36)} = 0.0007$<br>$P > 0.05$ | $F_{(2,36)} = 2.6$<br>$P > 0.05$   |                                          |                               |                                |                               |                               |                               |                               |                                |                               |
| Frontal Cortex | $F_{(1,42)} = 9.20$<br>$P < 0.01$ | $F_{(2,42)} = 4.38$<br>$P < 0.05$   | $F_{(2,42)} = 12.1$<br>$P < 0.001$ | $T_{14} = 1.69$<br>$P > 0.05$            | $T_{14} = 1.69$<br>$P > 0.05$ | $T_{14} = 5.25$<br>$P < 0.001$ | $T_{14} = 0.34$<br>$P > 0.05$ | $T_{14} = 2.03$<br>$P > 0.05$ | $T_{14} = 2.37$<br>$P > 0.05$ | $T_{14} = 3.73$<br>$P < 0.01$ | $T_{14} = 4.92$<br>$P < 0.001$ | $T_{14} = 1.19$<br>$P > 0.05$ |

c. Lasting BDNF induction by EET (T2) (Fig. 2c)

EET x age effects

| Two-way ANOVA  |     | EET-SCT Effects                   | Age Effects                       | EET-SCT X Age Interactions        | Post hoc Bonferroni multiple comparisons |                               |                               |                               |                                |                               |
|----------------|-----|-----------------------------------|-----------------------------------|-----------------------------------|------------------------------------------|-------------------------------|-------------------------------|-------------------------------|--------------------------------|-------------------------------|
|                |     |                                   |                                   |                                   | EET Effects (EET-SCT vs. SCT-SCT)        |                               |                               | Age Effects (ED, YA, OA)      |                                |                               |
|                |     |                                   |                                   |                                   | ED                                       | YA                            | OA                            | EET-SCT                       |                                |                               |
|                |     |                                   |                                   |                                   |                                          |                               |                               | ED vs YA                      | ED vs OA                       | YA vs OA                      |
| Hippocampus    | WT  | $F_{(1,38)} = 0.03$<br>$P > 0.05$ | $F_{(2,38)} = 0.63$<br>$P > 0.05$ | $F_{(2,38)} = 0.79$<br>$P > 0.05$ |                                          |                               |                               |                               |                                |                               |
|                | KIV | $F_{(1,38)} = 0.58$<br>$P > 0.05$ | $F_{(2,38)} = 5.23$<br>$P < 0.01$ | $F_{(2,38)} = 6.28$<br>$P < 0.01$ | $T_{13} = 2.67$<br>$P < 0.05$            | $T_{13} = 0.34$<br>$P > 0.05$ | $T_{12} = 0.95$<br>$P > 0.05$ | $T_{13} = 2.60$<br>$P > 0.05$ | $T_{12} = 4.71$<br>$P < 0.001$ | $T_{13} = 2.26$<br>$P > 0.05$ |
| Frontal Cortex | WT  | $F_{(1,40)} = 3.62$<br>$P > 0.05$ | $F_{(2,40)} = 0.80$<br>$P > 0.05$ | $F_{(2,40)} = 0.80$<br>$P > 0.05$ |                                          |                               |                               |                               |                                |                               |
|                | KIV | $F_{(1,42)} = 1.81$<br>$P > 0.05$ | $F_{(2,42)} = 2.87$<br>$P > 0.05$ | $F_{(2,42)} = 3.64$<br>$P < 0.05$ | $T_{14} = 2.75$<br>$P < 0.05$            | $T_{14} = 1.06$<br>$P > 0.05$ | $T_{14} = 0.64$<br>$P > 0.05$ | $T_{14} = 3.6$<br>$P < 0.01$  | $T_{14} = 1.9$<br>$P > 0.05$   | $T_{14} = 1.69$<br>$P > 0.05$ |

Genotype x age effects

| Two-way ANOVA  |  | Genotype Effects                   | Age Effects                       | Genotype X Age Interactions       | Post hoc Bonferroni multiple comparisons |                               |                               |                               |                               |                               |                               |                               |                               |
|----------------|--|------------------------------------|-----------------------------------|-----------------------------------|------------------------------------------|-------------------------------|-------------------------------|-------------------------------|-------------------------------|-------------------------------|-------------------------------|-------------------------------|-------------------------------|
|                |  |                                    |                                   |                                   | Genotype Effects (WT vs. KIV)            |                               |                               | Age Effects (ED, YA, OA)      |                               |                               |                               |                               |                               |
|                |  |                                    |                                   |                                   | ED                                       | YA                            | OA                            | WT                            |                               |                               | KIV                           |                               |                               |
|                |  |                                    |                                   |                                   |                                          |                               |                               | ED vs YA                      | ED vs OA                      | YA vs OA                      | ED vs YA                      | ED vs OA                      | YA vs OA                      |
| Hippocampus    |  | $F_{(1,40)} = 0.75$<br>$P > 0.05$  | $F_{(2,40)} = 5.39$<br>$P < 0.01$ | $F_{(2,40)} = 0.36$<br>$P > 0.05$ | $T_{12} = 1.00$<br>$P > 0.05$            | $T_{14} = 0.62$<br>$P > 0.05$ | $T_{13} = 0.16$<br>$P > 0.05$ | $T_{13} = 1.50$<br>$P > 0.05$ | $T_{13} = 1.65$<br>$P > 0.05$ | $T_{14} = 0.16$<br>$P > 0.05$ | $T_{13} = 1.93$<br>$P > 0.05$ | $T_{12} = 2.83$<br>$P < 0.05$ | $T_{13} = 0.16$<br>$P > 0.05$ |
| Frontal Cortex |  | $F_{(1,42)} = 14.1$<br>$P < 0.001$ | $F_{(2,42)} = 3.4$<br>$P < 0.05$  | $F_{(2,42)} = 4.21$<br>$P < 0.05$ | $T_{14} = 2.75$<br>$P < 0.05$            | $T_{14} = 1.28$<br>$P > 0.05$ | $T_{14} = 0.73$<br>$P > 0.05$ | $T_{14} = 0.18$<br>$P > 0.05$ | $T_{14} = 2.17$<br>$P > 0.05$ | $T_{14} = 1.99$<br>$P > 0.05$ | $T_{14} = 3.07$<br>$P < 0.05$ | $T_{14} = 1.62$<br>$P > 0.05$ | $T_{14} = 1.45$<br>$P > 0.05$ |

**4. Supplementary Figure 2.** Exon-specific BDNF transcription with SCT  
Genotype x age effects on basal level

| Two-way ANOVA  |        | Genotype Effects                   | Age Effects                        | Genotype X Age Interactions       | Post hoc Bonferroni multiple comparisons |                                |                                |                               |                               |                               |                               |                               |                               |
|----------------|--------|------------------------------------|------------------------------------|-----------------------------------|------------------------------------------|--------------------------------|--------------------------------|-------------------------------|-------------------------------|-------------------------------|-------------------------------|-------------------------------|-------------------------------|
|                |        |                                    |                                    |                                   | Genotype Effects (WT vs. KIV)            |                                |                                | Age Effects (ED, YA, OA)      |                               |                               |                               |                               |                               |
|                |        |                                    |                                    |                                   | ED                                       | YA                             | OA                             | WT                            |                               | KIV                           |                               |                               |                               |
|                |        |                                    |                                    |                                   |                                          |                                |                                | ED vs YA                      | ED vs OA                      | YA vs OA                      | ED vs YA                      | ED vs OA                      | YA vs OA                      |
| Hippocampus    | Exon I | $F_{(1,87)} = 186$<br>$P < 0.001$  | $F_{(2,87)} = 9.78$<br>$P < 0.005$ | $F_{(2,87)} = 2.98$<br>$P > 0.05$ | $T_{30} = 8.8$<br>$P < 0.001$            | $T_{29} = 6.0$<br>$P < 0.001$  | $T_{27} = 8.8$<br>$P < 0.001$  | $T_{29} = 2.8$<br>$P < 0.05$  | $T_{27} = 2.9$<br>$P < 0.05$  | $T_{26} = 0.15$<br>$P > 0.05$ | $T_{30} = 0.06$<br>$P > 0.05$ | $T_{28} = 3.35$<br>$P < 0.01$ | $T_{28} = 3.29$<br>$P < 0.01$ |
|                | IIa    | $F_{(1,88)} = 160$<br>$P < 0.001$  | $F_{(2,88)} = 1.75$<br>$P < 0.005$ | $F_{(2,88)} = 6.19$<br>$P > 0.05$ | $T_{30} = 8.1$<br>$P < 0.001$            | $T_{29} = 8.1$<br>$P < 0.001$  | $T_{29} = 5.7$<br>$P < 0.001$  | $T_{29} = 0.49$<br>$P > 0.05$ | $T_{29} = 3.0$<br>$P < 0.05$  | $T_{28} = 3.5$<br>$P < 0.01$  | $T_{30} = 0.42$<br>$P > 0.05$ | $T_{30} = 0.78$<br>$P > 0.05$ | $T_{30} = 1.2$<br>$P > 0.05$  |
|                | IIb    | $F_{(1,88)} = 120$<br>$P < 0.001$  | $F_{(2,88)} = 4.6$<br>$P < 0.05$   | $F_{(2,88)} = 1.45$<br>$P > 0.05$ | $T_{30} = 7.7$<br>$P < 0.001$            | $T_{29} = 6.1$<br>$P < 0.001$  | $T_{29} = 5.2$<br>$P < 0.001$  | $T_{29} = 0.85$<br>$P > 0.05$ | $T_{30} = 3.2$<br>$P < 0.05$  | $T_{29} = 2.3$<br>$P > 0.05$  | $T_{30} = 0.59$<br>$P > 0.05$ | $T_{29} = 0.73$<br>$P > 0.05$ | $T_{29} = 1.3$<br>$P > 0.05$  |
|                | IIc    | $F_{(1,88)} = 339$<br>$P < 0.001$  | $F_{(2,88)} = 10.2$<br>$P < 0.005$ | $F_{(2,88)} = 5.54$<br>$P < 0.01$ | $T_{30} = 12.9$<br>$P < 0.001$           | $T_{29} = 11.0$<br>$P < 0.001$ | $T_{29} = 8.1$<br>$P < 0.001$  | $T_{29} = 1.2$<br>$P > 0.05$  | $T_{30} = 5.3$<br>$P < 0.001$ | $T_{29} = 4.0$<br>$P < 0.005$ | $T_{30} = 0.51$<br>$P > 0.05$ | $T_{29} = 0.61$<br>$P > 0.05$ | $T_{29} = 1.11$<br>$P > 0.05$ |
|                | III    | $F_{(1,89)} = 190$<br>$P < 0.001$  | $F_{(2,89)} = 8.8$<br>$P < 0.005$  | $F_{(2,89)} = 3.5$<br>$P < 0.05$  | $T_{30} = 10.0$<br>$P < 0.001$           | $T_{29} = 7.5$<br>$P < 0.001$  | $T_{30} = 6.3$<br>$P < 0.001$  | $T_{29} = 2.1$<br>$P > 0.05$  | $T_{30} = 4.5$<br>$P < 0.001$ | $T_{29} = 2.6$<br>$P > 0.05$  | $T_{30} = 0.23$<br>$P > 0.05$ | $T_{30} = 1.1$<br>$P > 0.05$  | $T_{30} = 1.3$<br>$P > 0.05$  |
|                | V      | $F_{(1,41)} = 71$<br>$P < 0.001$   | $F_{(2,41)} = 2.33$<br>$P > 0.005$ | $F_{(2,41)} = 1.26$<br>$P > 0.05$ | $T_{14} = 5.8$<br>$P < 0.001$            | $T_{13} = 5.2$<br>$P < 0.001$  | $T_{14} = 3.6$<br>$P < 0.01$   | $T_{13} = 0.49$<br>$P > 0.05$ | $T_{14} = 2.5$<br>$P > 0.05$  | $T_{13} = 1.93$<br>$P > 0.05$ | $T_{14} = 0.13$<br>$P > 0.05$ | $T_{14} = 0.40$<br>$P > 0.05$ | $T_{14} = 0.27$<br>$P > 0.05$ |
|                | VI     | $F_{(1,88)} = 16.3$<br>$P < 0.001$ | $F_{(2,88)} = 5.71$<br>$P < 0.005$ | $F_{(2,88)} = 1.57$<br>$P > 0.05$ | $T_{29} = 3.6$<br>$P < 0.01$             | $T_{30} = 1.0$<br>$P > 0.05$   | $T_{29} = 2.4$<br>$P > 0.05$   | $T_{29} = 2.3$<br>$P > 0.05$  | $T_{29} = 3.0$<br>$P < 0.05$  | $T_{30} = 0.61$<br>$P > 0.05$ | $T_{30} = 0.2$<br>$P > 0.05$  | $T_{29} = 1.8$<br>$P > 0.05$  | $T_{29} = 2.03$<br>$P > 0.05$ |
|                | VIIa   | $F_{(1,89)} = 112$<br>$P < 0.001$  | $F_{(2,89)} = 8.35$<br>$P < 0.005$ | $F_{(2,89)} = 1.57$<br>$P > 0.05$ | $T_{30} = 7.6$<br>$P < 0.001$            | $T_{29} = 6.4$<br>$P < 0.001$  | $T_{30} = 4.4$<br>$P < 0.001$  | $T_{29} = 1.0$<br>$P > 0.05$  | $T_{30} = 4.3$<br>$P < 0.005$ | $T_{29} = 3.1$<br>$P < 0.05$  | $T_{30} = 0.2$<br>$P > 0.05$  | $T_{30} = 1.8$<br>$P > 0.05$  | $T_{30} = 1.2$<br>$P > 0.05$  |
|                | VIII   | $F_{(1,89)} = 60.0$<br>$P < 0.001$ | $F_{(2,89)} = 5.14$<br>$P < 0.01$  | $F_{(2,89)} = 2.15$<br>$P > 0.05$ | $T_{30} = 6.8$<br>$P < 0.001$            | $T_{29} = 5.5$<br>$P < 0.001$  | $T_{30} = 3.9$<br>$P < 0.001$  | $T_{29} = 0.92$<br>$P > 0.05$ | $T_{30} = 3.6$<br>$P < 0.01$  | $T_{29} = 2.6$<br>$P > 0.05$  | $T_{30} = 0.3$<br>$P > 0.05$  | $T_{30} = 0.65$<br>$P > 0.05$ | $T_{30} = 0.95$<br>$P > 0.05$ |
|                | IXa    | $F_{(1,89)} = 122$<br>$P < 0.001$  | $F_{(2,89)} = 6.33$<br>$P < 0.01$  | $F_{(2,89)} = 2.16$<br>$P > 0.05$ | $T_{30} = 7.9$<br>$P < 0.001$            | $T_{29} = 6.3$<br>$P < 0.001$  | $T_{30} = 4.9$<br>$P < 0.001$  | $T_{29} = 1.5$<br>$P > 0.05$  | $T_{30} = 3.9$<br>$P < 0.05$  | $T_{29} = 2.4$<br>$P > 0.05$  | $T_{30} = 0.01$<br>$P > 0.05$ | $T_{30} = 0.98$<br>$P > 0.05$ | $T_{30} = 1.00$<br>$P > 0.05$ |
| Frontal Cortex | I      | $F_{(1,87)} = 138$<br>$P < 0.001$  | $F_{(2,87)} = 11.1$<br>$P < 0.005$ | $F_{(2,87)} = 4.00$<br>$P < 0.05$ | $T_{28} = 9.0$<br>$P < 0.001$            | $T_{30} = 5.7$<br>$P < 0.001$  | $T_{29} = 5.6$<br>$P < 0.001$  | $T_{28} = 1.1$<br>$P > 0.05$  | $T_{28} = 4.2$<br>$P < 0.005$ | $T_{30} = 3.2$<br>$P < 0.05$  | $T_{30} = 2.43$<br>$P > 0.05$ | $T_{30} = 0.77$<br>$P > 0.05$ | $T_{30} = 3.16$<br>$P < 0.05$ |
|                | IIa    | $F_{(1,90)} = 154$<br>$P < 0.001$  | $F_{(2,90)} = 1.39$<br>$P < 0.05$  | $F_{(2,90)} = 0.88$<br>$P > 0.05$ | $T_{30} = 8.2$<br>$P < 0.001$            | $T_{30} = 6.9$<br>$P < 0.001$  | $T_{30} = 6.4$<br>$P < 0.001$  | $T_{30} = 0.58$<br>$P > 0.05$ | $T_{30} = 1.9$<br>$P > 0.05$  | $T_{30} = 1.3$<br>$P > 0.05$  | $T_{30} = 0.75$<br>$P > 0.05$ | $T_{30} = 0.07$<br>$P > 0.05$ | $T_{29} = 0.82$<br>$P > 0.05$ |
|                | IIb    | $F_{(1,90)} = 68.7$<br>$P < 0.001$ | $F_{(2,90)} = 0.30$<br>$P > 0.05$  | $F_{(2,90)} = 0.08$<br>$P > 0.05$ | $T_{30} = 4.6$<br>$P < 0.001$            | $T_{30} = 4.7$<br>$P < 0.001$  | $T_{30} = 5.1$<br>$P < 0.001$  | $T_{30} = 0.54$<br>$P > 0.05$ | $T_{30} = 0.66$<br>$P > 0.05$ | $T_{30} = 0.12$<br>$P > 0.05$ | $T_{30} = 0.49$<br>$P > 0.05$ | $T_{30} = 0.16$<br>$P > 0.05$ | $T_{30} = 0.33$<br>$P > 0.05$ |
|                | IIc    | $F_{(1,90)} = 288$<br>$P < 0.001$  | $F_{(2,90)} = 1.03$<br>$P > 0.05$  | $F_{(2,90)} = 0.76$<br>$P > 0.05$ | $T_{30} = 10.8$<br>$P < 0.001$           | $T_{30} = 9.55$<br>$P < 0.001$ | $T_{30} = 0.09$<br>$P < 0.001$ | $T_{30} = 0.12$<br>$P > 0.05$ | $T_{30} = 1.1$<br>$P > 0.05$  | $T_{30} = 1.2$<br>$P > 0.05$  | $T_{30} = 1.3$<br>$P > 0.05$  | $T_{30} = 1.1$<br>$P > 0.05$  | $T_{30} = 1.2$<br>$P > 0.05$  |
|                | III    | $F_{(1,90)} = 173$<br>$P < 0.001$  | $F_{(2,90)} = 0.353$<br>$P > 0.05$ | $F_{(2,90)} = 0.78$<br>$P > 0.05$ | $T_{30} = 8.5$<br>$P < 0.001$            | $T_{30} = 8.8$<br>$P < 0.001$  | $T_{30} = 7.5$<br>$P < 0.001$  | $T_{30} = 1.2$<br>$P > 0.05$  | $T_{30} = 1.1$<br>$P > 0.05$  | $T_{30} = 0.07$<br>$P < 0.05$ | $T_{30} = 0.58$<br>$P > 0.05$ | $T_{30} = 0.08$<br>$P > 0.05$ | $T_{30} = 0.65$<br>$P > 0.05$ |

|  |      |                                    |                                   |                                   |                               |                               |                               |                               |                               |                               |                               |                               |                               |
|--|------|------------------------------------|-----------------------------------|-----------------------------------|-------------------------------|-------------------------------|-------------------------------|-------------------------------|-------------------------------|-------------------------------|-------------------------------|-------------------------------|-------------------------------|
|  | V    | $F_{(1,90)} = 135$<br>$P < 0.001$  | $F_{(2,90)} = 1.87$<br>$P > 0.05$ | $F_{(2,90)} = 0.58$<br>$P > 0.05$ | $T_{30} = 7.4$<br>$P < 0.001$ | $T_{30} = 6.9$<br>$P < 0.001$ | $T_{30} = 5.9$<br>$P < 0.001$ | $T_{30} = 0.35$<br>$P > 0.05$ | $T_{30} = 2.2$<br>$P > 0.05$  | $T_{30} = 1.9$<br>$P < 0.05$  | $T_{30} = 0.90$<br>$P > 0.05$ | $T_{30} = 0.01$<br>$P > 0.01$ | $T_{30} = 0.88$<br>$P > 0.05$ |
|  | VI   | $F_{(1,90)} = 26.8$<br>$P < 0.001$ | $F_{(2,90)} = 0.49$<br>$P > 0.05$ | $F_{(2,90)} = 1.72$<br>$P > 0.05$ | $T_{30} = 3.6$<br>$P < 0.01$  | $T_{30} = 1.5$<br>$P > 0.05$  | $T_{30} = 3.9$<br>$P < 0.005$ | $T_{30} = 0.37$<br>$P < 0.05$ | $T_{30} = 0.71$<br>$P > 0.05$ | $T_{30} = 1.1$<br>$P > 0.05$  | $T_{30} = 1.7$<br>$P > 0.05$  | $T_{30} = 0.35$<br>$P > 0.01$ | $T_{30} = 1.35$<br>$P > 0.05$ |
|  | VIIa | $F_{(1,90)} = 125$<br>$P < 0.001$  | $F_{(2,90)} = 0.80$<br>$P > 0.05$ | $F_{(2,90)} = 0.50$<br>$P > 0.05$ | $T_{30} = 7.3$<br>$P < 0.001$ | $T_{30} = 6.1$<br>$P < 0.001$ | $T_{30} = 6.0$<br>$P < 0.001$ | $T_{30} = 0.10$<br>$P > 0.05$ | $T_{30} = 1.1$<br>$P > 0.05$  | $T_{30} = 1.0$<br>$P > 0.05$  | $T_{30} = 0.40$<br>$P > 0.05$ | $T_{30} = 0.17$<br>$P > 0.01$ | $T_{30} = 0.89$<br>$P > 0.05$ |
|  | VIII | $F_{(1,90)} = 110$<br>$P < 0.001$  | $F_{(2,90)} = 0.55$<br>$P > 0.05$ | $F_{(2,90)} = 0.56$<br>$P > 0.05$ | $T_{30} = 6.9$<br>$P > 0.05$  | $T_{30} = 5.4$<br>$P > 0.05$  | $T_{30} = 5.8$<br>$P < 0.001$ | $T_{30} = 0/61$<br>$P > 0.05$ | $T_{30} = 1.1$<br>$P > 0.05$  | $T_{30} = 0.45$<br>$P > 0.05$ | $T_{30} = 0.85$<br>$P > 0.05$ | $T_{30} = 0.06$<br>$P > 0.01$ | $T_{30} = 0.91$<br>$P > 0.05$ |
|  | IXa  | $F_{(1,90)} = 142$<br>$P < 0.001$  | $F_{(2,90)} = 0.73$<br>$P > 0.05$ | $F_{(2,90)} = 0.65$<br>$P > 0.05$ | $T_{30} = 7.8$<br>$P < 0.001$ | $T_{30} = 6.7$<br>$P < 0.001$ | $T_{30} = 6.2$<br>$P < 0.001$ | $T_{30} = 0.26$<br>$P > 0.05$ | $T_{30} = 2.1$<br>$P > 0.05$  | $T_{30} = 1.2$<br>$P > 0.05$  | $T_{30} = 0.84$<br>$P > 0.05$ | $T_{30} = 0.24$<br>$P > 0.01$ | $T_{30} = 0.84$<br>$P > 0.05$ |

| One-way ANOVA  |              | Age Effects                       | WT                            |                               |                               | KIV                           |                               |                               |
|----------------|--------------|-----------------------------------|-------------------------------|-------------------------------|-------------------------------|-------------------------------|-------------------------------|-------------------------------|
|                |              |                                   | ED vs YA                      | ED vs OA                      | YA vs OA                      | ED vs YA                      | ED vs OA                      | YA vs OA                      |
| Hippocampus    | exon IV (WT) | $F_{(2,43)} = 3.62$<br>$P < 0.05$ | $T_{29} = 1.3$<br>$P > 0.05$  | $T_{29} = 2.7$<br>$P < 0.05$  | $T_{28} = 1.4$<br>$P > 0.05$  |                               |                               |                               |
|                | IV-GFP (KIV) | $F_{(2,45)} = 2.63$<br>$P > 0.05$ |                               |                               |                               | $T_{30} = 0.40$<br>$P > 0.05$ | $T_{30} = 1.8$<br>$P > 0.05$  | $T_{30} = 2.2$<br>$P > 0.05$  |
| Frontal Cortex | exon IV (WT) | $F_{(2,45)} = 3.62$<br>$P < 0.05$ | $T_{30} = 0.37$<br>$P > 0.05$ | $T_{30} = 0.30$<br>$P < 0.05$ | $T_{30} = 0.66$<br>$P > 0.05$ |                               |                               |                               |
|                | IV-GFP (KIV) | $F_{(2,45)} = 2.63$<br>$P > 0.05$ |                               |                               |                               | $T_{30} = 0.99$<br>$P > 0.05$ | $T_{30} = 0.54$<br>$P > 0.05$ | $T_{30} = 0.46$<br>$P > 0.05$ |

**5. Figure 3** Exon-specific BDNF transcription with EET (T1)

EET x age effects

| Two-way ANOVA  |        |                                                         | EET Effects                                             | Age Effects                                            | EET X Age Interactions                                 | Post hoc Bonferroni multiple comparisons          |                                                   |                                                    |                                   |                                                    |                                                   |  |
|----------------|--------|---------------------------------------------------------|---------------------------------------------------------|--------------------------------------------------------|--------------------------------------------------------|---------------------------------------------------|---------------------------------------------------|----------------------------------------------------|-----------------------------------|----------------------------------------------------|---------------------------------------------------|--|
|                |        |                                                         |                                                         |                                                        |                                                        | EET Effects (EET vs. SCT)                         |                                                   |                                                    | Age Effects (ED, YA, OA)          |                                                    |                                                   |  |
|                |        |                                                         |                                                         |                                                        |                                                        | ED                                                | YA                                                | OA                                                 | EET                               |                                                    |                                                   |  |
|                |        |                                                         |                                                         |                                                        |                                                        |                                                   |                                                   |                                                    | ED vs YA                          | ED vs OA                                           | YA vs OA                                          |  |
| Hippocampus    | I      | WT                                                      | <b>F<sub>(1,40)</sub> = 31.3</b><br><b>P &lt; 0.001</b> | <b>F<sub>(2,40)</sub> = 6.68</b><br><b>P &lt; 0.01</b> | <b>F<sub>(2,40)</sub> = 6.68</b><br><b>P &lt; 0.01</b> | T <sub>14</sub> = 1.4<br>P > 0.05                 | T <sub>13</sub> = 2.3<br>P > 0.05                 | <b>T<sub>13</sub> = 6.1</b><br><b>P &lt; 0.001</b> | T <sub>14</sub> = 0.9<br>P > 0.05 | <b>T<sub>14</sub> = 5.0</b><br><b>P &lt; 0.001</b> | <b>T<sub>14</sub> = 4.1</b><br><b>P &lt; 0.01</b> |  |
|                |        | KIV                                                     | <b>F<sub>(1,39)</sub> = 5.65</b><br><b>P &lt; 0.05</b>  | F <sub>(12,39)</sub> = 1.47<br>P > 0.05                | F <sub>(2,39)</sub> = 0.23<br>P > 0.05                 | T <sub>13</sub> = 1.2<br>P > 0.05                 | T <sub>12</sub> = 1.0<br>P > 0.05                 | T <sub>14</sub> = 2.0<br>P > 0.05                  |                                   |                                                    |                                                   |  |
|                | IIa    | WT                                                      | <b>F<sub>(1,40)</sub> = 28.6</b><br><b>P &lt; 0.001</b> | F <sub>(2,40)</sub> = 0.61<br>P > 0.05                 | F <sub>(2,40)</sub> = 0.61<br>P > 0.05                 | <b>T<sub>14</sub> = 2.7</b><br><b>P &lt; 0.05</b> | <b>T<sub>13</sub> = 2.6</b><br><b>P &lt; 0.05</b> | <b>T<sub>13</sub> = 4.0</b><br><b>P &lt; 0.005</b> |                                   |                                                    |                                                   |  |
|                |        | KIV                                                     | <b>F<sub>(1,40)</sub> = 17.9</b><br><b>P &lt; 0.005</b> | <b>F<sub>(2,40)</sub> = 3.28</b><br><b>P &lt; 0.05</b> | F <sub>(2,40)</sub> = 1.76<br>P > 0.05                 | T <sub>14</sub> = 1.5<br>P > 0.05                 | T <sub>13</sub> = 1.9<br>P > 0.05                 | <b>T<sub>13</sub> = 3.0</b><br><b>P &lt; 0.001</b> | T <sub>14</sub> = 0.3<br>P > 0.05 | T <sub>13</sub> = 2.5<br>P > 0.05                  | T <sub>13</sub> = 2.8<br>P > 0.05                 |  |
|                | IIb    | WT                                                      | <b>F<sub>(1,40)</sub> = 21.3</b><br><b>P &lt; 0.001</b> | F <sub>(2,40)</sub> = 0.34<br>P > 0.05                 | F <sub>(2,40)</sub> = 0.34<br>P > 0.05                 | T <sub>13</sub> = 2.4<br>P > 0.05                 | <b>T<sub>13</sub> = 3.3</b><br><b>P &lt; 0.01</b> | T <sub>13</sub> = 2.3<br>P > 0.05                  |                                   |                                                    |                                                   |  |
|                |        | KIV                                                     | <b>F<sub>(1,40)</sub> = 29.2</b><br><b>P &lt; 0.001</b> | F <sub>(2,40)</sub> = 2.86<br>P > 0.05                 | F <sub>(2,41)</sub> = 1.1<br>P > 0.05                  | <b>T<sub>14</sub> = 2.7</b><br><b>P &lt; 0.05</b> | T <sub>12</sub> = 2.3<br>P > 0.05                 | <b>T<sub>14</sub> = 4.4</b><br><b>P &lt; 0.005</b> |                                   |                                                    |                                                   |  |
|                | IIc    | WT                                                      | <b>F<sub>(1,40)</sub> = 35.9</b><br><b>P &lt; 0.001</b> | F <sub>(2,40)</sub> = 2.2<br>P > 0.05                  | F <sub>(2,40)</sub> = 2.2<br>P > 0.05                  | T <sub>13</sub> = 2.1<br>P > 0.05                 | <b>T<sub>13</sub> = 3.1</b><br><b>P &lt; 0.05</b> | <b>T<sub>14</sub> = 5.1</b><br><b>P &lt; 0.001</b> |                                   |                                                    |                                                   |  |
|                |        | KIV                                                     | <b>F<sub>(1,41)</sub> = 32.7</b><br><b>P &lt; 0.001</b> | F <sub>(2,41)</sub> = 0.51<br>P > 0.05                 | F <sub>(2,41)</sub> = 0.12<br>P > 0.05                 | <b>T<sub>14</sub> = 3.0</b><br><b>P &lt; 0.05</b> | <b>T<sub>13</sub> = 3.3</b><br><b>P &lt; 0.01</b> | <b>T<sub>14</sub> = 3.6</b><br><b>P &lt; 0.01</b>  |                                   |                                                    |                                                   |  |
|                | III    | WT                                                      | <b>F<sub>(1,40)</sub> = 20.3</b><br><b>P &lt; 0.001</b> | F <sub>(2,40)</sub> = 0.10<br>P > 0.05                 | F <sub>(2,40)</sub> = 0.10<br>P > 0.05                 | T <sub>13</sub> = 2.2<br>P > 0.05                 | <b>T<sub>13</sub> = 2.8</b><br><b>P &lt; 0.05</b> | <b>T<sub>14</sub> = 2.8</b><br><b>P &lt; 0.05</b>  |                                   |                                                    |                                                   |  |
|                |        | KIV                                                     | <b>F<sub>(1,40)</sub> = 17.8</b><br><b>P &lt; 0.005</b> | F <sub>(2,40)</sub> = 2.87<br>P > 0.05                 | F <sub>(2,40)</sub> = 1.41<br>P > 0.05                 | T <sub>14</sub> = 1.6<br>P > 0.05                 | T <sub>14</sub> = 1.9<br>P > 0.05                 | <b>T<sub>14</sub> = 3.9</b><br><b>P &lt; 0.01</b>  |                                   |                                                    |                                                   |  |
|                | IV     | WT                                                      | <b>F<sub>(1,40)</sub> = 7.71</b><br><b>P &lt; 0.01</b>  | <b>F<sub>(2,40)</sub> = 3.48</b><br><b>P &lt; 0.05</b> | <b>F<sub>(2,40)</sub> = 3.48</b><br><b>P &lt; 0.05</b> | <b>T<sub>13</sub> = 3.2</b><br><b>P &lt; 0.01</b> | T <sub>13</sub> = 1.9<br>P > 0.05                 | T <sub>14</sub> = 0.4<br>P > 0.05                  | T <sub>14</sub> = 0.9<br>P > 0.05 | <b>T<sub>14</sub> = 3.6</b><br><b>P &lt; 0.01</b>  | T <sub>14</sub> = 2.4<br>P > 0.05                 |  |
|                |        | KIV                                                     | <b>F<sub>(1,40)</sub> = 9.23</b><br><b>P &lt; 0.01</b>  | F <sub>(2,40)</sub> = 0.11<br>P > 0.05                 | F <sub>(2,40)</sub> = 0.28<br>P > 0.05                 | T <sub>13</sub> = 2.3<br>P > 0.05                 | T <sub>13</sub> = 1.6<br>P > 0.05                 | T <sub>14</sub> = 1.3<br>P > 0.05                  |                                   |                                                    |                                                   |  |
|                | V      | WT                                                      | <b>F<sub>(1,22)</sub> = 6.10</b><br><b>P &lt; 0.05</b>  | F <sub>(2,22)</sub> = 0.23<br>P > 0.05                 | F <sub>(2,22)</sub> = 0.23<br>P > 0.05                 | T <sub>11</sub> = 2.3<br>P > 0.05                 | T <sub>5</sub> = 0.85<br>P > 0.05                 | T <sub>6</sub> = 1.4<br>P > 0.05                   |                                   |                                                    |                                                   |  |
|                |        | KIV                                                     | F <sub>(1,21)</sub> = 1.03<br>P > 0.05                  | F <sub>(2,21)</sub> = 1.87<br>P > 0.05                 | F <sub>(2,21)</sub> = 1.60<br>P > 0.05                 |                                                   |                                                   |                                                    |                                   |                                                    |                                                   |  |
|                | VI     | WT                                                      | <b>F<sub>(1,41)</sub> = 8.53</b><br><b>P &lt; 0.01</b>  | F <sub>(2,41)</sub> = 1.36<br>P > 0.05                 | F <sub>(2,41)</sub> = 1.36<br>P > 0.05                 | <b>T<sub>14</sub> = 2.9</b><br><b>P &lt; 0.05</b> | T <sub>13</sub> = 1.7<br>P > 0.05                 | T <sub>14</sub> = 0.5<br>P > 0.05                  |                                   |                                                    |                                                   |  |
|                |        | KIV                                                     | <b>F<sub>(1,41)</sub> = 19.4</b><br><b>P &lt; 0.001</b> | F <sub>(2,41)</sub> = 0.02<br>P > 0.05                 | F <sub>(2,41)</sub> = 0.45<br>P > 0.05                 | T <sub>14</sub> = 2.2<br>P > 0.05                 | <b>T<sub>13</sub> = 3.3</b><br><b>P &lt; 0.01</b> | T <sub>14</sub> = 2.2<br>P > 0.05                  |                                   |                                                    |                                                   |  |
|                | VIIa   | WT                                                      | <b>F<sub>(1,41)</sub> = 11.3</b><br><b>P &lt; 0.01</b>  | F <sub>(2,41)</sub> = 1.36<br>P > 0.05                 | F <sub>(2,41)</sub> = 1.36<br>P > 0.05                 | T <sub>14</sub> = 1.8<br>P > 0.05                 | T <sub>13</sub> = 1.8<br>P > 0.05                 | T <sub>14</sub> = 2.2<br>P > 0.05                  |                                   |                                                    |                                                   |  |
|                |        | KIV                                                     | <b>F<sub>(1,41)</sub> = 23.4</b><br><b>P &lt; 0.001</b> | F <sub>(2,41)</sub> = 0.04<br>P > 0.05                 | F <sub>(2,41)</sub> = 0.70<br>P > 0.05                 | T <sub>13</sub> = 2.1<br>P > 0.05                 | <b>T<sub>13</sub> = 3.7</b><br><b>P &lt; 0.01</b> | <b>T<sub>14</sub> = 2.6</b><br><b>P &lt; 0.05</b>  |                                   |                                                    |                                                   |  |
|                | VIII   | WT                                                      | <b>F<sub>(1,41)</sub> = 22.4</b><br><b>P &lt; 0.001</b> | F <sub>(2,41)</sub> = 1.36<br>P > 0.05                 | F <sub>(2,41)</sub> = 1.36<br>P > 0.05                 | T <sub>14</sub> = 1.7<br>P > 0.05                 | <b>T<sub>13</sub> = 3.3</b><br><b>P &lt; 0.01</b> | <b>T<sub>14</sub> = 3.1</b><br><b>P &lt; 0.05</b>  |                                   |                                                    |                                                   |  |
|                |        | KIV                                                     | <b>F<sub>(1,41)</sub> = 21.3</b><br><b>P &lt; 0.001</b> | F <sub>(2,41)</sub> = 0.97<br>P > 0.05                 | F <sub>(2,41)</sub> = 0.01<br>P > 0.05                 | <b>T<sub>13</sub> = 2.7</b><br><b>P &lt; 0.05</b> | <b>T<sub>13</sub> = 2.6</b><br><b>P &lt; 0.05</b> | <b>T<sub>14</sub> = 2.7</b><br><b>P &lt; 0.05</b>  |                                   |                                                    |                                                   |  |
| IXa            | WT     | <b>F<sub>(1,41)</sub> = 13.4</b><br><b>P &lt; 0.01</b>  | F <sub>(2,41)</sub> = 0.68<br>P > 0.05                  | F <sub>(2,41)</sub> = 0.68<br>P > 0.05                 | T <sub>14</sub> = 1.4<br>P > 0.05                      | <b>T<sub>13</sub> = 2.9</b><br><b>P &lt; 0.05</b> | T <sub>14</sub> = 2.0<br>P > 0.05                 |                                                    |                                   |                                                    |                                                   |  |
|                | KIV    | <b>F<sub>(1,40)</sub> = 12.7</b><br><b>P &lt; 0.005</b> | F <sub>(2,41)</sub> = 0.34<br>P > 0.05                  | F <sub>(2,41)</sub> = 1.65<br>P > 0.05                 | T <sub>13</sub> = 0.9<br>P > 0.05                      | <b>T<sub>13</sub> = 3.4</b><br><b>P &lt; 0.01</b> | T <sub>14</sub> = 1.9<br>P > 0.05                 |                                                    |                                   |                                                    |                                                   |  |
| Frontal Cortex | Exon I | WT                                                      | <b>F<sub>(1,42)</sub> = 6.45</b><br><b>P &lt; 0.05</b>  | <b>F<sub>(2,42)</sub> = 3.35</b><br><b>P &lt; 0.05</b> | <b>F<sub>(2,42)</sub> = 3.35</b><br><b>P &lt; 0.05</b> | T <sub>14</sub> = 0.5<br>P > 0.05                 | T <sub>14</sub> = 1.7<br>P > 0.05                 | <b>T<sub>14</sub> = 3.1</b><br><b>P &lt; 0.01</b>  | T <sub>14</sub> = 2.1<br>P > 0.05 | <b>T<sub>14</sub> = 3.6</b><br><b>P &lt; 0.01</b>  | T <sub>14</sub> = 1.5<br>P > 0.05                 |  |
|                |        | KIV                                                     | <b>F<sub>(1,37)</sub> = 7.89</b><br><b>P &lt; 0.01</b>  | <b>F<sub>(2,37)</sub> = 3.52</b><br><b>P &lt; 0.05</b> | F <sub>(2,37)</sub> = 1.02<br>P > 0.05                 | <b>T<sub>13</sub> = 2.7</b><br><b>P &lt; 0.05</b> | T <sub>13</sub> = 0.8<br>P > 0.05                 | T <sub>13</sub> = 1.3<br>P > 0.05                  | T <sub>13</sub> = 2.6<br>P > 0.05 | T <sub>13</sub> = 2.2<br>P > 0.05                  | T <sub>14</sub> = 0.4<br>P > 0.05                 |  |
|                | IIa    | WT                                                      | <b>F<sub>(1,42)</sub> = 8.55</b><br><b>P &lt; 0.01</b>  | F <sub>(2,42)</sub> = 0.17<br>P > 0.05                 | F <sub>(2,42)</sub> = 0.17<br>P > 0.05                 | T <sub>14</sub> = 1.3<br>P > 0.05                 | T <sub>14</sub> = 1.7<br>P > 0.05                 | T <sub>14</sub> = 2.1<br>P > 0.05                  |                                   |                                                    |                                                   |  |
|                |        | KIV                                                     | F <sub>(1,40)</sub> = 3.31<br>P > 0.05                  | F <sub>(2,40)</sub> = 0.39<br>P > 0.05                 | F <sub>(2,40)</sub> = 0.39<br>P > 0.05                 |                                                   |                                                   |                                                    |                                   |                                                    |                                                   |  |
|                | IIb    | WT                                                      | F <sub>(1,42)</sub> = 2.26<br>P > 0.05                  | F <sub>(2,42)</sub> = 0.12<br>P > 0.05                 | F <sub>(2,42)</sub> = 0.12<br>P > 0.05                 |                                                   |                                                   |                                                    |                                   |                                                    |                                                   |  |
|                |        | KIV                                                     | <b>F<sub>(1,41)</sub> = 5.53</b><br><b>P &lt; 0.05</b>  | F <sub>(2,41)</sub> = 2.80<br>P > 0.05                 | F <sub>(2,41)</sub> = 2.80<br>P > 0.05                 | <b>T<sub>13</sub> = 3.2</b><br><b>P &lt; 0.01</b> | T <sub>14</sub> = 0.5<br>P > 0.05                 | T <sub>14</sub> = 0.2<br>P > 0.05                  | T <sub>13</sub> = 2.7<br>P > 0.05 | <b>T<sub>13</sub> = 3.0</b><br><b>P &lt; 0.05</b>  | T <sub>14</sub> = 0.3<br>P > 0.05                 |  |
|                | IIc    | WT                                                      | <b>F<sub>(1,42)</sub> = 9.72</b><br><b>P &lt; 0.05</b>  | F <sub>(2,42)</sub> = 0.20<br>P > 0.05                 | F <sub>(2,42)</sub> = 0.20<br>P > 0.05                 | T <sub>14</sub> = 1.6<br>P > 0.05                 | T <sub>14</sub> = 1.5<br>P > 0.05                 | T <sub>14</sub> = 2.3<br>P > 0.05                  |                                   |                                                    |                                                   |  |





**6. Figure 4** Exon-specific BDNF transcription with EET-SCT (T2)

a. EET x age effects

| Two-way ANOVA  |      | EET-SCT Effects                   | Age Effects                                                              | EET-SCT X Age Interactions                                                | Post hoc Bonferroni multiple comparisons                                  |                                                                      |                              |                                                                     |                                                                      |                                                                      |                                                                     |
|----------------|------|-----------------------------------|--------------------------------------------------------------------------|---------------------------------------------------------------------------|---------------------------------------------------------------------------|----------------------------------------------------------------------|------------------------------|---------------------------------------------------------------------|----------------------------------------------------------------------|----------------------------------------------------------------------|---------------------------------------------------------------------|
|                |      |                                   |                                                                          |                                                                           | EET-SCT Effects (EET-SCT vs. SCT-SCT)                                     |                                                                      |                              | Age Effects (ED, YA, OA)                                            |                                                                      |                                                                      |                                                                     |
|                |      |                                   |                                                                          |                                                                           | ED                                                                        | YA                                                                   | OA                           | EET                                                                 |                                                                      |                                                                      |                                                                     |
|                |      |                                   |                                                                          |                                                                           |                                                                           |                                                                      |                              | ED vs YA                                                            | ED vs OA                                                             | YA vs OA                                                             |                                                                     |
| Hippocampus    | I    | WT                                | $F_{(1,41)} = 0.01$<br>$P > 0.05$                                        | $F_{(2,41)} = 2.89$<br>$P > 0.05$                                         | $F_{(2,41)} = 2.89$<br>$P > 0.05$                                         |                                                                      |                              |                                                                     |                                                                      |                                                                      |                                                                     |
|                |      | KIV                               | $F_{(1,36)} = 0.62$<br>$P < 0.05$                                        | $F_{(2,36)} = 2.84$<br>$P > 0.05$                                         | <b><math>F_{(2,39)} = 4.01</math></b><br><b><math>P &lt; 0.05</math></b>  | $T_{12} = 1.2$<br>$P > 0.05$                                         | $T_{12} = 1.0$<br>$P > 0.05$ | $T_{12} = 2.0$<br>$P > 0.05$                                        | <b><math>T_{12} = 3.6</math></b><br><b><math>P &lt; 0.05</math></b>  | $T_{14} = 1.1$<br>$P > 0.05$                                         | $T_{12} = 2.5$<br>$P > 0.05$                                        |
|                | IIa  | WT                                | $F_{(1,41)} = 1.23$<br>$P > 0.05$                                        | $F_{(2,41)} = 0.17$<br>$P > 0.05$                                         | $F_{(2,41)} = 0.17$<br>$P > 0.05$                                         |                                                                      |                              |                                                                     |                                                                      |                                                                      |                                                                     |
|                |      | KIV                               | $F_{(1,39)} = 0.01$<br>$P > 0.05$                                        | $F_{(2,39)} = 0.57$<br>$P > 0.05$                                         | $F_{(2,39)} = 1.09$<br>$P > 0.05$                                         |                                                                      |                              |                                                                     |                                                                      |                                                                      |                                                                     |
|                | IIb  | WT                                | $F_{(1,41)} = 0.14$<br>$P > 0.05$                                        | $F_{(2,41)} = 0.01$<br>$P > 0.05$                                         | $F_{(2,41)} = 0.01$<br>$P > 0.05$                                         |                                                                      |                              |                                                                     |                                                                      |                                                                      |                                                                     |
|                |      | KIV                               | $F_{(1,37)} = 0.02$<br>$P > 0.05$                                        | $F_{(2,37)} = 0.93$<br>$P > 0.05$                                         | $F_{(2,37)} = 2.26$<br>$P > 0.05$                                         |                                                                      |                              |                                                                     |                                                                      |                                                                      |                                                                     |
|                | IIc  | WT                                | $F_{(1,41)} = 0.06$<br>$P > 0.05$                                        | $F_{(2,41)} = 0.09$<br>$P > 0.05$                                         | $F_{(2,41)} = 0.09$<br>$P > 0.05$                                         |                                                                      |                              |                                                                     |                                                                      |                                                                      |                                                                     |
|                |      | KIV                               | $F_{(1,38)} = 0.27$<br>$P > 0.05$                                        | <b><math>F_{(2,37)} = 3.59</math></b><br><b><math>P &lt; 0.05</math></b>  | <b><math>F_{(2,38)} = 5.36</math></b><br><b><math>P &lt; 0.01</math></b>  | <b><math>T_{12} = 2.9</math></b><br><b><math>P &lt; 0.05</math></b>  | $T_{13} = 1.2$<br>$P > 0.05$ | $T_{13} = 0.9$<br>$P > 0.05$                                        | <b><math>T_{12} = 3.7</math></b><br><b><math>P &lt; 0.01</math></b>  | <b><math>T_{13} = 3.7</math></b><br><b><math>P &lt; 0.01</math></b>  | $T_{13} = 0.2$<br>$P > 0.05$                                        |
|                | III  | WT                                | $F_{(1,41)} = 0.29$<br>$P > 0.05$                                        | $F_{(2,41)} = 0.27$<br>$P > 0.05$                                         | $F_{(2,41)} = 0.27$<br>$P > 0.05$                                         |                                                                      |                              |                                                                     |                                                                      |                                                                      |                                                                     |
|                |      | KIV                               | $F_{(1,39)} = 0.01$<br>$P > 0.05$                                        | $F_{(2,39)} = 1.14$<br>$P > 0.05$                                         | $F_{(2,39)} = 2.12$<br>$P > 0.05$                                         |                                                                      |                              |                                                                     |                                                                      |                                                                      |                                                                     |
|                | IV   | WT                                | $F_{(1,41)} = 0.34$<br>$P > 0.05$                                        | $F_{(2,41)} = 0.28$<br>$P > 0.05$                                         | $F_{(2,41)} = 0.28$<br>$P > 0.05$                                         |                                                                      |                              |                                                                     |                                                                      |                                                                      |                                                                     |
|                |      | KIV                               | $F_{(1,40)} = 0.14$<br>$P > 0.05$                                        | $F_{(2,40)} = 0.38$<br>$P > 0.05$                                         | $F_{(2,40)} = 0.38$<br>$P > 0.05$                                         |                                                                      |                              |                                                                     |                                                                      |                                                                      |                                                                     |
|                | V    | WT                                | $F_{(1,18)} = 0.01$<br>$P > 0.05$                                        | $F_{(2,18)} = 0.58$<br>$P > 0.05$                                         | $F_{(2,18)} = 0.58$<br>$P > 0.05$                                         |                                                                      |                              |                                                                     |                                                                      |                                                                      |                                                                     |
|                |      | KIV                               | $F_{(1,18)} = 0.11$<br>$P > 0.05$                                        | <b><math>F_{(2,18)} = 3.71</math></b><br><b><math>P &lt; 0.05</math></b>  | $F_{(2,18)} = 2.2$<br>$P > 0.05$                                          | $T_6 = 1.9$<br>$P > 0.05$                                            | $T_6 = 0.6$<br>$P > 0.05$    | $T_6 = 0.8$<br>$P > 0.05$                                           | $T_6 = 0.7$<br>$P > 0.05$                                            | $T_6 = 2.7$<br>$P > 0.05$                                            | $T_6 = 2.0$<br>$P > 0.05$                                           |
|                | VI   | WT                                | $F_{(1,41)} = 1.40$<br>$P > 0.05$                                        | $F_{(2,41)} = 0.47$<br>$P > 0.05$                                         | $F_{(2,41)} = 0.47$<br>$P > 0.05$                                         |                                                                      |                              |                                                                     |                                                                      |                                                                      |                                                                     |
|                |      | KIV                               | $F_{(1,39)} = 1.63$<br>$P > 0.05$                                        | $F_{(2,39)} = 1.29$<br>$P > 0.05$                                         | $F_{(2,39)} = 1.29$<br>$P > 0.05$                                         |                                                                      |                              |                                                                     |                                                                      |                                                                      |                                                                     |
|                | VIIa | WT                                | $F_{(1,41)} = 0.44$<br>$P > 0.05$                                        | $F_{(2,41)} = 0.27$<br>$P > 0.05$                                         | $F_{(2,41)} = 0.27$<br>$P > 0.05$                                         |                                                                      |                              |                                                                     |                                                                      |                                                                      |                                                                     |
|                |      | KIV                               | $F_{(1,40)} = 0.01$<br>$P > 0.05$                                        | <b><math>F_{(2,40)} = 7.22</math></b><br><b><math>P &lt; 0.01</math></b>  | <b><math>F_{(2,40)} = 7.22</math></b><br><b><math>P &lt; 0.01</math></b>  | <b><math>T_{13} = 2.9</math></b><br><b><math>P &lt; 0.05</math></b>  | $T_{13} = 2.0$<br>$P > 0.05$ | $T_{14} = 1.5$<br>$P > 0.05$                                        | <b><math>T_{12} = 4.8</math></b><br><b><math>P &lt; 0.005</math></b> | <b><math>T_{13} = 4.3</math></b><br><b><math>P &lt; 0.005</math></b> | $T_{13} = 0.6$<br>$P > 0.05$                                        |
|                | VIII | WT                                | $F_{(1,41)} = 0.12$<br>$P > 0.05$                                        | $F_{(2,41)} = 0.22$<br>$P > 0.05$                                         | $F_{(2,41)} = 0.22$<br>$P > 0.05$                                         |                                                                      |                              |                                                                     |                                                                      |                                                                      |                                                                     |
|                |      | KIV                               | $F_{(1,40)} = 1.89$<br>$P > 0.05$                                        | <b><math>F_{(2,40)} = 5.62</math></b><br><b><math>P &lt; 0.01</math></b>  | <b><math>F_{(2,40)} = 5.6</math></b><br><b><math>P &lt; 0.01</math></b>   | <b><math>T_{13} = 3.5</math></b><br><b><math>P &lt; 0.01</math></b>  | $T_{13} = 0.2$<br>$P > 0.05$ | $T_{14} = 1.0$<br>$P > 0.05$                                        | <b><math>T_{12} = 3.5</math></b><br><b><math>P &lt; 0.01</math></b>  | <b><math>T_{13} = 4.4</math></b><br><b><math>P &lt; 0.005</math></b> | $T_{13} = 0.7$<br>$P > 0.05$                                        |
| IXa            | WT   | $F_{(1,41)} = 0.21$<br>$P > 0.05$ | $F_{(2,41)} = 0.76$<br>$P > 0.05$                                        | $F_{(2,41)} = 0.76$<br>$P > 0.05$                                         |                                                                           |                                                                      |                              |                                                                     |                                                                      |                                                                      |                                                                     |
|                | KIV  | $F_{(1,39)} = 1.77$<br>$P > 0.05$ | $F_{(2,39)} = 2.38$<br>$P > 0.05$                                        | <b><math>F_{(2,39)} = 3.69</math></b><br><b><math>P &lt; 0.05</math></b>  | <b><math>T_{12} = 2.7</math></b><br><b><math>P &lt; 0.05</math></b>       | $T_{13} = 1.2$<br>$P > 0.05$                                         | $T_{14} = 0.8$<br>$P > 0.05$ | <b><math>T_{12} = 3.4</math></b><br><b><math>P &lt; 0.01</math></b> | $T_{13} = 1.6$<br>$P > 0.05$                                         | $T_{13} = 1.9$<br>$P > 0.05$                                         |                                                                     |
| Frontal Cortex | I    | WT                                | $F_{(1,40)} = 1.09$<br>$P > 0.05$                                        | $F_{(2,40)} = 0.80$<br>$P > 0.05$                                         | $F_{(2,42)} = 0.80$<br>$P > 0.05$                                         |                                                                      |                              |                                                                     |                                                                      |                                                                      |                                                                     |
|                |      | KIV                               | <b><math>F_{(1,41)} = 4.75</math></b><br><b><math>P &lt; 0.05</math></b> | <b><math>F_{(2,41)} = 11.5</math></b><br><b><math>P &lt; 0.005</math></b> | <b><math>F_{(2,41)} = 11.5</math></b><br><b><math>P &lt; 0.005</math></b> | <b><math>T_{14} = 4.7</math></b><br><b><math>P &lt; 0.001</math></b> | $T_{13} = 2.2$<br>$P > 0.05$ | $T_{14} = 1.4$<br>$P > 0.05$                                        | <b><math>T_{13} = 6.7</math></b><br><b><math>P &lt; 0.001</math></b> | <b><math>T_{14} = 3.3</math></b><br><b><math>P &lt; 0.05</math></b>  | <b><math>T_{13} = 3.5</math></b><br><b><math>P &lt; 0.01</math></b> |
|                | IIa  | WT                                | $F_{(1,42)} = 0.10$<br>$P > 0.05$                                        | $F_{(2,42)} = 0.21$<br>$P > 0.05$                                         | $F_{(2,42)} = 0.21$<br>$P > 0.05$                                         |                                                                      |                              |                                                                     |                                                                      |                                                                      |                                                                     |
|                |      | KIV                               | $F_{(1,40)} = 1.62$<br>$P < 0.05$                                        | $F_{(2,40)} = 1.32$<br>$P > 0.05$                                         | $F_{(2,40)} = 2.18$<br>$P > 0.05$                                         |                                                                      |                              |                                                                     |                                                                      |                                                                      |                                                                     |
|                | IIb  | WT                                | $F_{(1,42)} = 0.08$<br>$P > 0.05$                                        | $F_{(2,42)} = 0.12$<br>$P > 0.05$                                         | $F_{(2,42)} = 0.12$<br>$P > 0.05$                                         |                                                                      |                              |                                                                     |                                                                      |                                                                      |                                                                     |
|                |      | KIV                               | $F_{(1,40)} = 1.16$<br>$P > 0.05$                                        | <b><math>F_{(2,40)} = 3.77</math></b><br><b><math>P &lt; 0.05</math></b>  | <b><math>F_{(2,40)} = 5.98</math></b><br><b><math>P &lt; 0.01</math></b>  | <b><math>T_{12} = 3.3</math></b><br><b><math>P &lt; 0.01</math></b>  | $T_{14} = 1.2$<br>$P > 0.05$ | $T_{14} = 0.4$<br>$P > 0.05$                                        | <b><math>T_{13} = 4.2</math></b><br><b><math>P &lt; 0.005</math></b> | <b><math>T_{13} = 3.3</math></b><br><b><math>P &lt; 0.05</math></b>  | $T_{14} = 0.9$<br>$P < 0.01$                                        |
|                | IIc  | WT                                | $F_{(1,42)} = 0.37$<br>$P > 0.05$                                        | $F_{(2,42)} = 0.22$<br>$P > 0.05$                                         | $F_{(2,42)} = 0.22$<br>$P > 0.05$                                         |                                                                      |                              |                                                                     |                                                                      |                                                                      |                                                                     |
|                |      | KIV                               | <b><math>F_{(1,41)} = 6.49</math></b><br><b><math>P &lt; 0.01</math></b> | <b><math>F_{(2,41)} = 3.41</math></b><br><b><math>P &lt; 0.05</math></b>  | <b><math>F_{(2,41)} = 3.41</math></b><br><b><math>P &lt; 0.05</math></b>  | $T_{13} = 2.3$<br>$P > 0.05$                                         | $T_{14} = 0.6$<br>$P > 0.05$ | <b><math>T_{14} = 2.7</math></b><br><b><math>P &lt; 0.05</math></b> | <b><math>T_{13} = 2.9</math></b><br><b><math>P &lt; 0.05</math></b>  | $T_{13} = 0.3$<br>$P > 0.05$                                         | <b><math>T_{14} = 3.4</math></b><br><b><math>P &lt; 0.01</math></b> |

|      |     |                                                   |                                                   |                                                   |                                              |                            |                                              |                                              |                                              |                                              |                    |
|------|-----|---------------------------------------------------|---------------------------------------------------|---------------------------------------------------|----------------------------------------------|----------------------------|----------------------------------------------|----------------------------------------------|----------------------------------------------|----------------------------------------------|--------------------|
|      |     |                                                   | <b>P &lt; 0.05</b>                                | <b>P &lt; 0.05</b>                                | <b>P &lt; 0.05</b>                           | P > 0.05                   | P > 0.05                                     | <b>P &lt; 0.05</b>                           | <b>P &lt; 0.05</b>                           | P > 0.05                                     | <b>P &lt; 0.05</b> |
| III  | WT  | $F_{(1,42)} = 0.01$<br>P > 0.05                   | $F_{(2,42)} = 0.10$<br>P > 0.05                   | $F_{(2,42)} = 0.10$<br>P > 0.05                   |                                              |                            |                                              |                                              |                                              |                                              |                    |
|      | KIV | $F_{(1,40)} = 2.86$<br>P < 0.05                   | <b><math>F_{(2,40)} = 3.78</math></b><br>P < 0.05 | <b><math>F_{(2,40)} = 4.46</math></b><br>P < 0.05 | $T_{12} = 2.0$<br>P > 0.05                   | $T_{14} = 1.5$<br>P > 0.05 | $T_{14} = 2.3$<br>P > 0.05                   | <b><math>T_{13} = 3.1</math></b><br>P < 0.05 | $T_{13} = 0.5$<br>P > 0.05                   | <b><math>T_{14} = 3.8</math></b><br>P < 0.01 |                    |
| IV   | WT  | $F_{(1,42)} = 0.39$<br>P > 0.05                   | $F_{(2,42)} = 0.12$<br>P > 0.05                   | $F_{(2,42)} = 0.12$<br>P > 0.05                   |                                              |                            |                                              |                                              |                                              |                                              |                    |
|      | KIV | $F_{(1,41)} = 0.58$<br>P < 0.05                   | <b><math>F_{(2,41)} = 3.68</math></b><br>P < 0.05 | <b><math>F_{(2,41)} = 3.68</math></b><br>P < 0.05 | <b><math>T_{13} = 2.6</math></b><br>P < 0.05 | $T_{14} = 0.7$<br>P > 0.05 | $T_{14} = 0.6$<br>P > 0.05                   | <b><math>T_{13} = 3.3</math></b><br>P < 0.05 | <b><math>T_{13} = 3.2</math></b><br>P < 0.05 | $T_{14} = 0.1$<br>P > 0.05                   |                    |
| V    | WT  | $F_{(1,42)} = 0.64$<br>P > 0.05                   | $F_{(2,42)} = 0.21$<br>P > 0.05                   | $F_{(2,42)} = 0.21$<br>P > 0.05                   |                                              |                            |                                              |                                              |                                              |                                              |                    |
|      | KIV | <b><math>F_{(1,38)} = 5.59</math></b><br>P < 0.01 | $F_{(2,38)} = 2.49$<br>P > 0.05                   | $F_{(2,39)} = 3.01$<br>P > 0.05                   | $T_{12} = 2.2$<br>P > 0.05                   | $T_{13} = 0.6$<br>P > 0.05 | $T_{13} = 2.5$<br>P > 0.05                   |                                              |                                              |                                              |                    |
| VI   | WT  | $F_{(1,42)} = 1.13$<br>P > 0.05                   | $F_{(2,42)} = 0.06$<br>P > 0.05                   | $F_{(2,42)} = 0.06$<br>P > 0.05                   |                                              |                            |                                              |                                              |                                              |                                              |                    |
|      | KIV | $F_{(1,40)} = 2.09$<br>P > 0.05                   | $F_{(2,40)} = 2.41$<br>P > 0.05                   | <b><math>F_{(2,40)} = 4.47</math></b><br>P < 0.05 | <b><math>T_{12} = 3.1</math></b><br>P < 0.05 | $T_{14} = 1.0$<br>P > 0.05 | $T_{14} = 0.3$<br>P > 0.05                   | <b><math>T_{13} = 3.6</math></b><br>P < 0.01 | $T_{13} = 2.3$<br>P > 0.05                   | $T_{14} = 1.4$<br>P > 0.05                   |                    |
| VIIa | WT  | $F_{(1,42)} = 0.17$<br>P > 0.05                   | $F_{(2,42)} = 0.10$<br>P > 0.05                   | $F_{(2,42)} = 0.10$<br>P > 0.05                   |                                              |                            |                                              |                                              |                                              |                                              |                    |
|      | KIV | <b><math>F_{(1,40)} = 6.18</math></b><br>P < 0.05 | <b><math>F_{(2,40)} = 4.51</math></b><br>P < 0.05 | <b><math>F_{(2,40)} = 5.73</math></b><br>P < 0.01 | <b><math>T_{12} = 2.8</math></b><br>P < 0.05 | $T_{14} = 1.5$<br>P > 0.05 | <b><math>T_{14} = 2.7</math></b><br>P < 0.05 | <b><math>T_{13} = 3.6</math></b><br>P < 0.01 | $T_{13} = 0.3$<br>P > 0.05                   | <b><math>T_{14} = 4.1</math></b><br>P < 0.01 |                    |
| VIII | WT  | $F_{(1,42)} = 0.73$<br>P > 0.05                   | $F_{(2,42)} = 0.10$<br>P > 0.05                   | $F_{(2,42)} = 0.10$<br>P > 0.05                   |                                              |                            |                                              |                                              |                                              |                                              |                    |
|      | KIV | $F_{(1,40)} = 1.45$<br>P < 0.05                   | $F_{(2,40)} = 2.19$<br>P > 0.05                   | <b><math>F_{(2,40)} = 3.75</math></b><br>P < 0.05 | <b><math>T_{12} = 2.6</math></b><br>P < 0.05 | $T_{14} = 1.2$<br>P > 0.05 | $T_{14} = 0.5$<br>P > 0.05                   | <b><math>T_{13} = 3.4</math></b><br>P < 0.01 | $T_{13} = 1.8$<br>P > 0.05                   | $T_{14} = 1.7$<br>P > 0.05                   |                    |
| IXa  | WT  | $F_{(1,42)} = 1.34$<br>P > 0.05                   | $F_{(2,42)} = 0.16$<br>P > 0.05                   | $F_{(2,42)} = 0.16$<br>P > 0.05                   |                                              |                            |                                              |                                              |                                              |                                              |                    |
|      | KIV | $F_{(1,40)} = 2.86$<br>P < 0.05                   | <b><math>F_{(2,40)} = 3.78</math></b><br>P < 0.05 | <b><math>F_{(2,40)} = 4.46</math></b><br>P < 0.05 | $T_{12} = 2.0$<br>P > 0.05                   | $T_{14} = 1.5$<br>P > 0.05 | $T_{14} = 2.3$<br>P > 0.05                   | <b><math>T_{13} = 3.1</math></b><br>P < 0.05 | $T_{13} = 0.5$<br>P > 0.05                   | <b><math>T_{14} = 3.8</math></b><br>P < 0.01 |                    |

b. Genotype x age effects on EET effects

| Two-way ANOVA |      | Genotype Effects                | Age Effects                                        | Genotype X Age Interactions                        | Post hoc Bonferroni multiple comparisons     |                            |                            |                            |                            |                            |                                               |                                               |                            |
|---------------|------|---------------------------------|----------------------------------------------------|----------------------------------------------------|----------------------------------------------|----------------------------|----------------------------|----------------------------|----------------------------|----------------------------|-----------------------------------------------|-----------------------------------------------|----------------------------|
|               |      |                                 |                                                    |                                                    | Genotype Effects (WT vs. KIV)                |                            |                            | Age Effects (ED, YA, OA)   |                            |                            |                                               |                                               |                            |
|               |      |                                 |                                                    |                                                    | ED                                           | YA                         | OA                         | WT                         |                            |                            | KIV                                           |                                               |                            |
|               |      |                                 |                                                    |                                                    |                                              |                            |                            | ED vs YA                   | ED vs OA                   | YA vs OA                   | ED vs YA                                      | ED vs OA                                      | YA vs OA                   |
| Hippocampus   | I    | $F_{(1,40)} = 0.42$<br>P > 0.05 | <b><math>F_{(2,40)} = 8.66</math></b><br>P < 0.005 | $F_{(2,40)} = 3.02$<br>P > 0.05                    |                                              |                            |                            | $T_{14} = 1.9$<br>P > 0.05 | $T_{14} = 2.5$<br>P > 0.05 | $T_{14} = 0.7$<br>P > 0.05 | <b><math>T_{12} = 3.8</math></b><br>P < 0.01  | $T_{14} = 1.2$<br>P > 0.05                    | $T_{12} = 2.7$<br>P > 0.05 |
|               | IIa  | $F_{(1,40)} = 0.81$<br>P > 0.05 | $F_{(2,40)} = 1.57$<br>P > 0.05                    | $F_{(2,40)} = 0.23$<br>P > 0.05                    |                                              |                            |                            |                            |                            |                            |                                               |                                               |                            |
|               | IIb  | $F_{(1,40)} = 0.01$<br>P > 0.05 | $F_{(2,40)} = 2.30$<br>P > 0.05                    | $F_{(2,40)} = 1.85$<br>P > 0.05                    |                                              |                            |                            |                            |                            |                            |                                               |                                               |                            |
|               | IIc  | $F_{(1,40)} = 0.28$<br>P > 0.05 | <b><math>F_{(2,40)} = 3.62</math></b><br>P < 0.05  | <b><math>F_{(2,40)} = 5.74</math></b><br>P < 0.01  | $T_{13} = 3.1$<br>P < 0.05                   | $T_{14} = 1.2$<br>P > 0.05 | $T_{14} = 1.0$<br>P > 0.05 | $T_{14} = 0.4$<br>P > 0.05 | $T_{14} = 0.5$<br>P > 0.05 | $T_{14} = 0.1$<br>P > 0.05 | <b><math>T_{12} = 3.7</math></b><br>P < 0.01  | <b><math>T_{13} = 3.5</math></b><br>P < 0.01  | $T_{13} = 0.2$<br>P > 0.05 |
|               | III  | $F_{(1,40)} = 0.11$<br>P > 0.05 | $F_{(2,40)} = 1.12$<br>P > 0.05                    | <b><math>F_{(2,40)} = 4.58</math></b><br>P < 0.05  | $T_{14} = 2.4$<br>P > 0.05                   | $T_{14} = 1.9$<br>P > 0.05 | $T_{14} = 0.0$<br>P > 0.05 | $T_{14} = 1.1$<br>P > 0.05 | $T_{14} = 0.8$<br>P > 0.05 | $T_{14} = 0.3$<br>P > 0.05 | <b><math>T_{12} = 3.1</math></b><br>P < 0.05  | $T_{13} = 1.7$<br>P > 0.05                    | $T_{14} = 1.5$<br>P > 0.05 |
|               | IV   | $F_{(1,40)} = 0.18$<br>P > 0.05 | $F_{(1,40)} = 0.11$<br>P > 0.05                    | $F_{(2,40)} = 0.97$<br>P > 0.05                    |                                              |                            |                            |                            |                            |                            |                                               |                                               |                            |
|               | V    | $F_{(1,18)} = 2.62$<br>P > 0.05 | <b><math>F_{(2,18)} = 4.62</math></b><br>P < 0.05  | $F_{(2,18)} = 1.54$<br>P > 0.05                    |                                              |                            |                            | $T_6 = 0.5$<br>P > 0.05    | $T_6 = 0.7$<br>P > 0.05    | $T_6 = 1.2$<br>P > 0.05    | $T_6 = 0.8$<br>P > 0.05                       | <b><math>T_6 = 3.1</math></b><br>P < 0.05     | $T_6 = 2.4$<br>P > 0.05    |
|               | VI   | $F_{(1,40)} = 0.01$<br>P > 0.05 | $F_{(1,40)} = 0.27$<br>P > 0.05                    | $F_{(2,40)} = 2.37$<br>P > 0.05                    |                                              |                            |                            |                            |                            |                            |                                               |                                               |                            |
|               | VIIa | $F_{(1,40)} = 0.14$<br>P > 0.05 | <b><math>F_{(2,40)} = 6.37</math></b><br>P < 0.01  | <b><math>F_{(2,40)} = 9.95</math></b><br>P < 0.005 | <b><math>T_{14} = 3.7</math></b><br>P < 0.01 | $T_{14} = 2.3$<br>P > 0.05 | $T_{14} = 0.8$<br>P > 0.05 | $T_{14} = 1.0$<br>P > 0.05 | $T_{14} = 0.0$<br>P > 0.05 | $T_{14} = 1.0$<br>P > 0.05 | <b><math>T_{12} = 5.0</math></b><br>P < 0.005 | <b><math>T_{13} = 4.5</math></b><br>P < 0.005 | $T_{13} = 0.6$<br>P > 0.05 |
|               | VIII | $F_{(1,40)} = 1.16$<br>P > 0.05 | <b><math>F_{(2,40)} = 6.15</math></b><br>P < 0.01  | <b><math>F_{(2,40)} = 4.99</math></b><br>P < 0.05  | <b><math>T_{14} = 3.2</math></b><br>P < 0.01 | $T_{14} = 0.7$<br>P > 0.05 | $T_{14} = 0.7$<br>P > 0.05 | $T_{14} = 0.3$<br>P > 0.05 | $T_{14} = 0.5$<br>P > 0.05 | $T_{14} = 0.8$<br>P > 0.05 | <b><math>T_{12} = 3.5</math></b><br>P < 0.01  | <b><math>T_{13} = 4.3</math></b><br>P < 0.01  | $T_{13} = 0.7$<br>P > 0.05 |

|                |      |                                                         |                                                          |                                                         |                                                    |                                   |                                                    |                                   |                                   |                                   |                                                     |                                                    |                                                    |
|----------------|------|---------------------------------------------------------|----------------------------------------------------------|---------------------------------------------------------|----------------------------------------------------|-----------------------------------|----------------------------------------------------|-----------------------------------|-----------------------------------|-----------------------------------|-----------------------------------------------------|----------------------------------------------------|----------------------------------------------------|
|                |      |                                                         |                                                          | <b>P &lt; 0.01</b>                                      | P > 0.05                                           | P > 0.05                          | P > 0.05                                           | P > 0.05                          | P > 0.05                          | P > 0.05                          | <b>P &lt; 0.01</b>                                  | <b>P &lt; 0.005</b>                                | P > 0.05                                           |
|                | IXa  | F <sub>(1, 40)</sub> = 0.48<br>P > 0.05                 | F <sub>(1, 40)</sub> = 1.33<br>P > 0.05                  | <b>F<sub>(2, 40)</sub> = 0.60</b><br><b>P &lt; 0.01</b> | T <sub>14</sub> = 2.5<br>P > 0.05                  | T <sub>14</sub> = 2.3<br>P > 0.05 | T <sub>14</sub> = 1.0<br>P > 0.05                  | T <sub>14</sub> = 1.4<br>P > 0.05 | T <sub>14</sub> = 0.1<br>P > 0.05 | T <sub>14</sub> = 1.4<br>P > 0.05 | T <sub>12</sub> = <b>3.4</b><br><b>P &lt; 0.01</b>  | T <sub>13</sub> = 1.6<br>P > 0.05                  | T <sub>13</sub> = 1.9<br>P > 0.05                  |
| Frontal Cortex | I    | F <sub>(1, 41)</sub> = 0.74<br>P > 0.05                 | <b>F<sub>(2, 41)</sub> = 12.3</b><br><b>P &lt; 0.001</b> | <b>F<sub>(2, 41)</sub> = 4.66</b><br><b>P &lt; 0.05</b> | T <sub>14</sub> = <b>2.9</b><br><b>P &lt; 0.05</b> | T <sub>13</sub> = 1.4<br>P > 0.05 | T <sub>14</sub> = 0.1<br>P > 0.05                  | T <sub>14</sub> = 1.4<br>P > 0.05 | T <sub>14</sub> = 2.2<br>P > 0.05 | T <sub>14</sub> = 1.4<br>P > 0.05 | T <sub>13</sub> = <b>5.5</b><br><b>P &lt; 0.001</b> | T <sub>14</sub> = 2.7<br>P > 0.05                  | T <sub>13</sub> = <b>2.9</b><br><b>P &lt; 0.05</b> |
|                | IIa  | F <sub>(1, 41)</sub> = 1.76<br>P > 0.05                 | F <sub>(2, 41)</sub> = 2.01<br>P > 0.05                  | F <sub>(2, 41)</sub> = 1.90<br>P > 0.05                 |                                                    |                                   |                                                    |                                   |                                   |                                   |                                                     |                                                    |                                                    |
|                | IIb  | F <sub>(1, 41)</sub> = 0.27<br>P > 0.05                 | <b>F<sub>(2, 41)</sub> = 7.61</b><br><b>P &lt; 0.01</b>  | <b>F<sub>(2, 41)</sub> = 3.78</b><br><b>P &lt; 0.05</b> | T <sub>13</sub> = 2.5<br>P > 0.05                  | T <sub>14</sub> = 1.2<br>P > 0.05 | T <sub>14</sub> = 0.4<br>P > 0.05                  | T <sub>14</sub> = 0.8<br>P > 0.05 | T <sub>14</sub> = 0.6<br>P > 0.05 | T <sub>14</sub> = 0.2<br>P > 0.05 | T <sub>13</sub> = <b>4.4</b><br><b>P &lt; 0.005</b> | T <sub>13</sub> = <b>3.5</b><br><b>P &lt; 0.01</b> | T <sub>14</sub> = 1.0<br>P > 0.05                  |
|                | IIc  | <b>F<sub>(1, 41)</sub> = 9.88</b><br><b>P &lt; 0.01</b> | <b>F<sub>(2, 41)</sub> = 4.65</b><br><b>P &lt; 0.05</b>  | F <sub>(2, 41)</sub> = 2.8<br>P > 0.05                  | T <sub>13</sub> = <b>2.9</b><br><b>P &lt; 0.05</b> | T <sub>14</sub> = 0.1<br>P > 0.05 | T <sub>14</sub> = <b>2.6</b><br><b>P &lt; 0.05</b> | T <sub>14</sub> = 0.0<br>P > 0.05 | T <sub>14</sub> = 0.8<br>P > 0.05 | T <sub>14</sub> = 0.7<br>P > 0.05 | T <sub>13</sub> = <b>3.0</b><br><b>P &lt; 0.05</b>  | T <sub>13</sub> = 0.3<br>P > 0.05                  | T <sub>14</sub> = <b>3.4</b><br><b>P &lt; 0.01</b> |
|                | III  | F <sub>(1, 41)</sub> = 0.05<br>P > 0.05                 | F <sub>(2, 41)</sub> = 1.51<br>P > 0.05                  | F <sub>(2, 41)</sub> = 2.37<br>P > 0.05                 |                                                    |                                   |                                                    |                                   |                                   |                                   |                                                     |                                                    |                                                    |
|                | IV   | F <sub>(1, 41)</sub> = 0.00<br>P > 0.05                 | F <sub>(2, 41)</sub> = 1.50<br>P > 0.05                  | <b>F<sub>(2, 41)</sub> = 3.72</b><br><b>P &lt; 0.05</b> | T <sub>13</sub> = 2.2<br>P > 0.05                  | T <sub>14</sub> = 1.1<br>P > 0.05 | T <sub>14</sub> = 1.2<br>P > 0.05                  | T <sub>14</sub> = 0.6<br>P > 0.05 | T <sub>14</sub> = 0.6<br>P > 0.05 | T <sub>14</sub> = 0.1<br>P > 0.05 | T <sub>13</sub> = 2.7<br>P > 0.05                   | T <sub>13</sub> = 2.7<br>P > 0.05                  | T <sub>14</sub> = 0.1<br>P > 0.05                  |
|                | V    | F <sub>(1, 39)</sub> = 1.69<br>P > 0.05                 | F <sub>(2, 39)</sub> = 2.39<br>P > 0.05                  | F <sub>(2, 39)</sub> = 2.72<br>P > 0.05                 |                                                    |                                   |                                                    |                                   |                                   |                                   |                                                     |                                                    |                                                    |
|                | VI   | F <sub>(1, 41)</sub> = 0.00<br>P > 0.05                 | F <sub>(2, 41)</sub> = 2.83<br>P > 0.05                  | <b>F<sub>(2, 41)</sub> = 3.97</b><br><b>P &lt; 0.05</b> | T <sub>13</sub> = 2.2<br>P > 0.05                  | T <sub>14</sub> = 1.6<br>P > 0.05 | T <sub>14</sub> = 1.2<br>P > 0.05                  | T <sub>14</sub> = 0.2<br>P > 0.05 | T <sub>14</sub> = 0.6<br>P > 0.05 | T <sub>14</sub> = 0.2<br>P > 0.05 | T <sub>13</sub> = <b>3.6</b><br><b>P &lt; 0.01</b>  | T <sub>13</sub> = 2.3<br>P > 0.05                  | T <sub>14</sub> = 1.3<br>P > 0.05                  |
|                | VIIa | F <sub>(1, 41)</sub> = 2.93<br>P > 0.05                 | <b>F<sub>(2, 41)</sub> = 4.52</b><br><b>P &lt; 0.05</b>  | <b>F<sub>(2, 41)</sub> = 4.96</b><br><b>P &lt; 0.05</b> | T <sub>13</sub> = 2.3<br>P > 0.05                  | T <sub>14</sub> = 1.6<br>P > 0.05 | T <sub>14</sub> = 2.2<br>P > 0.05                  | T <sub>14</sub> = 0.4<br>P > 0.05 | T <sub>14</sub> = 0.6<br>P > 0.05 | T <sub>14</sub> = 0.2<br>P > 0.05 | T <sub>13</sub> = <b>3.5</b><br><b>P &lt; 0.01</b>  | T <sub>13</sub> = 1.7<br>P > 0.05                  | T <sub>14</sub> = <b>3.9</b><br><b>P &lt; 0.01</b> |
|                | VIII | F <sub>(1, 41)</sub> = 0.00<br>P > 0.05                 | F <sub>(2, 41)</sub> = 1.95<br>P > 0.05                  | <b>F<sub>(2, 41)</sub> = 3.74</b><br><b>P &lt; 0.05</b> | T <sub>13</sub> = 2.0<br>P > 0.05                  | T <sub>14</sub> = 1.8<br>P > 0.05 | T <sub>14</sub> = 0.3<br>P > 0.05                  | T <sub>14</sub> = 0.6<br>P > 0.05 | T <sub>14</sub> = 0.6<br>P > 0.05 | T <sub>14</sub> = 0.1<br>P > 0.05 | T <sub>13</sub> = <b>3.3</b><br><b>P &lt; 0.01</b>  | T <sub>13</sub> = 1.7<br>P > 0.05                  | T <sub>14</sub> = 1.6<br>P > 0.05                  |
|                | IXa  | F <sub>(1, 41)</sub> = 0.07<br>P > 0.05                 | F <sub>(2, 41)</sub> = 2.87<br>P > 0.05                  | <b>F<sub>(2, 41)</sub> = 4.25</b><br><b>P &lt; 0.05</b> | T <sub>13</sub> = 1.3<br>P > 0.05                  | T <sub>14</sub> = 2.2<br>P > 0.05 | T <sub>14</sub> = 1.3<br>P > 0.05                  | T <sub>14</sub> = 0.7<br>P > 0.05 | T <sub>14</sub> = 0.6<br>P > 0.05 | T <sub>14</sub> = 0.1<br>P > 0.05 | T <sub>13</sub> = <b>2.8</b><br><b>P &lt; 0.05</b>  | T <sub>13</sub> = 0.5<br>P > 0.05                  | T <sub>14</sub> = <b>3.5</b><br><b>P &lt; 0.01</b> |
