# Supplementary material
Source: PubMed Central journal article supplement (PMC6214784)

# Supplementary Fig. 1

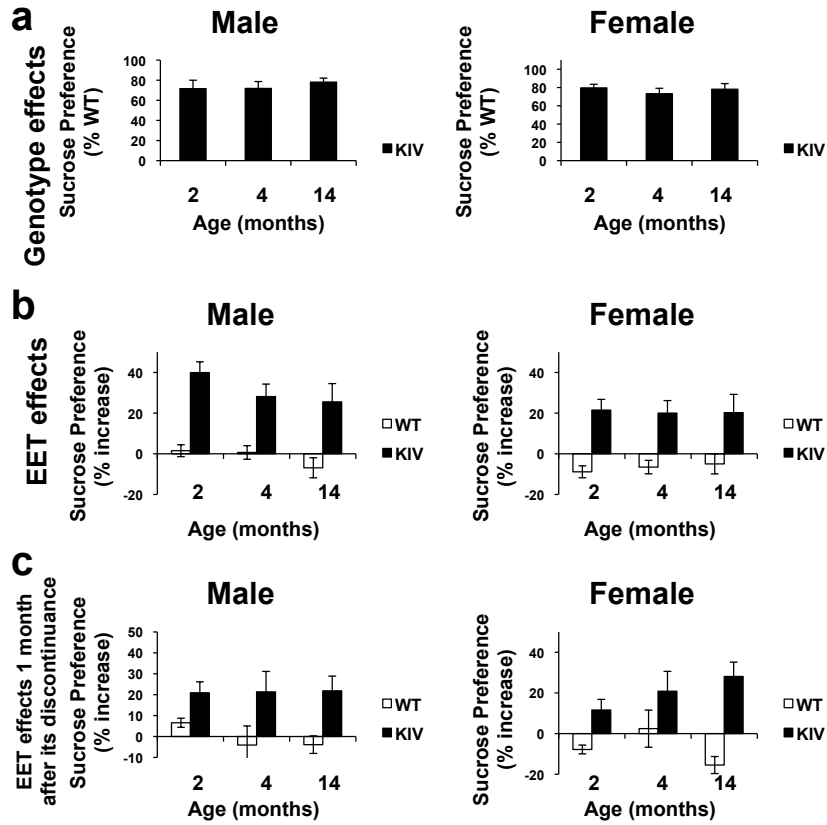

Supplement: NIHMS964045-supplement-Supp_FigS1.pdf [file NIHMS964045-supplement-Supp_FigS1.pdf]
